# Acoustic regularities in infant-directed speech and song across cultures

Courtney B. Hilton<sup>1,^</sup>, Cody J. Moser<sup>1,2,^</sup>, Mila Bertolo<sup>1</sup>, Harry Lee-Rubin<sup>1</sup>, Dorsa Amir<sup>3</sup>, Constance M. Bainbridge<sup>1,4</sup>, Jan Simson<sup>1,5</sup>, Dean Knox<sup>6</sup>, Luke Glowacki<sup>7</sup>, Andrzej Galbarczyk<sup>8</sup>, Grazyna Jasienska<sup>8</sup>, Cody T. Ross<sup>9</sup>, Mary Beth Neff<sup>10,11</sup>, Alia Martin<sup>10</sup>, Laura K. Cirelli<sup>12,13</sup>, Sandra E. Trehub<sup>13</sup>, Jinqi Song<sup>14</sup>, Minju Kim<sup>15</sup>, Adena Schachner<sup>15</sup>, Tom A. Vardy<sup>16</sup>, Quentin D. Atkinson<sup>16,17</sup>, Jan Antfolk<sup>18</sup>, Purnima Madhivanan<sup>19,20,21,22</sup>, Anand Siddaiah<sup>22</sup>, Caitlyn D. Placek<sup>23</sup>, Gul Deniz Salali<sup>24</sup>, Sarai Keestra<sup>24</sup>, Manvir Singh<sup>25,26</sup>, Scott A. Collins<sup>27</sup>, John Q. Patton<sup>28</sup>, Camila Scaff<sup>29</sup>, Jonathan Stieglitz<sup>26,30</sup>, Cristina Moya<sup>31,32</sup>, Rohan R. Sagar<sup>33</sup>, Brian M. Wood<sup>34</sup>, Max M. Krasnow<sup>1,35</sup> & Samuel A. Mehr<sup>1,10,36,\*</sup>

- <sup>1</sup>Department of Psychology, Harvard University, Cambridge, MA 02138, USA.  
<sup>2</sup>Department of Cognitive and Information Sciences, University of California Merced, Merced, CA 95343, USA.  
<sup>3</sup>Boston College Department of Psychology, Chestnut Hill, MA 02467, USA.  
<sup>4</sup>Department of Communication, University of California Los Angeles, Los Angeles, CA 90095, USA.  
<sup>5</sup>Department of Psychology, University of Amsterdam, 1012 WX Amsterdam, The Netherlands.  
<sup>6</sup>Department of Politics, Princeton University, Princeton, NJ 08544, USA.  
<sup>7</sup>Department of Anthropology, Boston University, Boston, MA 02215, USA.  
<sup>8</sup>Department of Environmental Health, Faculty of Health Sciences, Jagiellonian University Medical College, 31-066 Krakow, Poland.  
<sup>9</sup>Department of Human Behavior, Ecology and Culture, Max Planck Institute for Evolutionary Anthropology, 04103 Leipzig, Germany.  
<sup>10</sup>School of Psychology, Victoria University of Wellington, Wellington 6012, New Zealand.  
<sup>11</sup>Department of Philosophy, Classics, History of Art and Ideas, University of Oslo, Oslo 0315, Norway.  
<sup>12</sup>Department of Psychology, University of Toronto Scarborough, Toronto, Ontario M1C 1A4, Canada.  
<sup>13</sup>Department of Psychology, University of Toronto Mississauga, Mississauga, Ontario L5L 1C6, Canada.  
<sup>14</sup>Department of Mathematics, University of California Los Angeles, Los Angeles, CA 90095, USA.  
<sup>15</sup>Department of Psychology, University of California, San Diego, La Jolla, CA 92093-0109, USA.  
<sup>16</sup>School of Psychology, University of Auckland, Auckland 1010, New Zealand.  
<sup>17</sup>Department of Linguistic and Cultural Evolution, Max Planck Institute for the Science of Human History, D-07745 Jena, Germany.  
<sup>18</sup>Department of Psychology, Åbo Akademi, 20500 Turku, Finland.  
<sup>19</sup>Department of Health Promotion Sciences, College of Public Health, University of Arizona, Tucson, AZ 85724, USA.  
<sup>20</sup>Department of Medicine, Division of Infectious Diseases, College of Medicine, University of Arizona, Tucson, AZ 85724, USA.  
<sup>21</sup>Department of Family & Community Medicine, College of Medicine, University of Arizona, Tucson, AZ 85724, USA.  
<sup>22</sup>Public Health Research Institute of India, Mysuru 570020, India.  
<sup>23</sup>Department of Anthropology, Ball State University, Muncie, IN 47306, USA.  
<sup>24</sup>Department of Anthropology, University College London, WC1H 0BW London, UK.  
<sup>25</sup>Department of Human Evolutionary Biology, Harvard University, Cambridge, MA 02138, USA.  
<sup>26</sup>Institute for Advanced Study in Toulouse, 31080 Toulouse Cedex 6, France.  
<sup>27</sup>School of Human Evolution and Social Change, Arizona State University, Tempe, AZ 85281, USA.  
<sup>28</sup>Division of Anthropology, California State University, Fullerton, CA 92831, USA.  
<sup>29</sup>Institute of Evolutionary Medicine, University of Zurich, 8006 Zürich, Switzerland.  
<sup>30</sup>Université Toulouse 1 Capitole, 31080 Toulouse Cedex 6, France.  
<sup>31</sup>Department of Anthropology, University of California, Davis, Davis, CA 95616, USA.  
<sup>32</sup>Centre for Culture & Evolution, Brunel University London, UB8 3PH Uxbridge, UK.  
<sup>33</sup>Future Generations University, Circle Ville, WV 26807, USA.  
<sup>34</sup>Department of Anthropology, University of California, Los Angeles, Los Angeles, CA 90095, USA.  
<sup>35</sup>Division of Continuing Education, Harvard University, Cambridge, MA 02138, USA.  
<sup>36</sup>Data Science Initiative, Harvard University, Cambridge, MA 02138, USA.

<sup>^</sup>These authors contributed equally and are listed alphabetically.

\*Corresponding author. E-mail: [sam@wjh.harvard.edu](mailto:sam@wjh.harvard.edu)

## Abstract

Across taxa, the forms of vocal signals are shaped by their functions<sup>1–15</sup>. In humans, a salient context of vocal signaling is infant care, as human infants are altricial<sup>16,17</sup>. Humans often produce “parent-ese”, speech and song for infants that differ acoustically from ordinary speech and song<sup>18–35</sup>, in fashions that are thought to support parent-infant communication and infant language learning<sup>36–39</sup>; modulate infant affect<sup>33,40–45</sup>; or credibly signal information to infants<sup>46</sup>. These theories predict a universal form-function link in infant-directed vocalizations, with consistent differentiation between infant-directed and adult-directed vocalizations across cultures. Some evidence supports this prediction<sup>23,27,28,32,47–50</sup>, but the limited generalizability of individual ethnographic reports and laboratory experiments<sup>51</sup> and small stimulus sets<sup>52</sup>, along with intriguing reports of counterexamples<sup>53–60</sup>, leave the question open. Here, we show that infant-directed speech and song are robustly differentiable from their adult-directed counterparts, within voices and across cultures. We built a corpus of 1615 recordings of infant- and adult-directed singing and speech produced by 410 people living in 21 urban, rural, and small-scale societies and played the recordings to 45,745 people recruited online from many countries. We asked them to guess whether or not each vocalization was, in fact, infant-directed. The patterns of inferences of these naïve listeners, supported by acoustic analyses and predictive modelling, demonstrate acoustic cues to infant-directedness that are cross-culturally robust. The cues to infant-directedness differ across language and music, however, informing hypotheses of the psychological functions and evolution of both.

# 1 Main

2 The forms of many animal signals are shaped by their functions, a link arising from production- and reception-  
3 related rules that help to maintain reliable signal detection within and across species<sup>1-6</sup>. Form-function links  
4 are widespread in vocal signals across taxa, from meerkats to fish<sup>3,7-10</sup>, causing acoustic regularities that  
5 allow cross-species intelligibility<sup>11-13,15</sup>. This facilitates the ability of some species to eavesdrop on the  
6 vocalizations of other species, for example, as in superb fairywrens (*Malurus cyaneus*), who learn to flee  
7 predatory birds in response to alarm calls that they themselves do not produce<sup>14</sup>.

8 In humans, an important context for the effective transmission of vocal signals is between parents and infants,  
9 as human infants are particularly helpless<sup>16</sup>. To elicit care, infants use a distinctive alarm signal: they cry<sup>17</sup>.  
10 In response, adults produce infant-directed language and music (sometimes referred to as “parent-ese”) in  
11 forms of speech and song with putatively stereotyped acoustics<sup>18-35</sup>.

12 These stereotyped acoustics are thought to be functional: supporting language acquisition<sup>36-39</sup>, modulating  
13 infant affect and temperament<sup>33,40,41</sup>, and signalling information to infants<sup>46</sup>. These theories all share a  
14 key prediction: like the vocal signals of other species, the forms of infant-directed vocalizations should be  
15 universally shaped by their functions, instantiated with clear regularities across cultures. Evidence for a  
16 universal form-function link is mixed, however, given the limited generalizability of individual ethnographic  
17 reports and laboratory studies<sup>51</sup>; small stimulus sets<sup>52</sup>; and a variety of counterexamples<sup>53,54,56-60</sup>.

18 In language, infant-directed speech is primarily characterized by higher and more variable pitch<sup>61</sup> and more  
19 exaggerated and variable vowels<sup>23,62,63</sup>, in modern industrialized societies<sup>23,28,47,48,50,64,65</sup> and a few small-  
20 scale societies<sup>49,66</sup>. Infants are themselves sensitive to these features, preferring them, even if spoken in  
21 unfamiliar languages<sup>67-69</sup>. But these acoustic features are *less* exaggerated in some cultures<sup>58,64,70</sup> and  
22 apparently vary in relation to the age and sex of the infant<sup>64,71,72</sup>.

23 In music, infant-directed songs also have stereotyped acoustic features. Lullabies, for example, tend toward  
24 slower tempos, reduced accentuation, and simple repetitive melodic patterns<sup>31,32,35,73</sup>, supporting functional  
25 roles associated with infant care<sup>33,41,46</sup> in industrialized<sup>34,74-76</sup> and small-scale societies<sup>77,78</sup>. Infants are  
26 soothed by these acoustic features, whether produced in familiar<sup>44,45</sup> or unfamiliar songs<sup>79</sup>, and both adults  
27 and children reliably associate the same features with a soothing function<sup>31,32,73</sup>. But cross-cultural studies  
28 of infant-directed song have primarily relied upon archival recordings from disparate sources<sup>29,31,32</sup>; an ap-  
29 proach that poorly controls for differences in voices, behavioral contexts, recording equipment, and historical  
30 conventions.

31 The degree to which infant-directed vocalizations are acoustically stereotyped across cultures is therefore  
32 unclear. To address this, we created a corpus of infant-directed song, infant-directed speech, adult-directed  
33 song, and adult-directed speech from a diverse set of 21 human societies, totaling 1615 field recordings  
34 of 410 individual voices (Fig. 1a, Table 1, and Methods; the corpus is open-access at [https://doi.org/10.  
35 5281/zenodo.5525161](https://doi.org/10.5281/zenodo.5525161)). Participants were asked to provide all four vocalization types, enabling within-voice  
36 analyses.

37 Here, we report analyses of the corpus, using computational methods and a citizen-science experiment, to  
38 study three questions: (i) Is infant-directedness mutually intelligible across cultures? (ii) Are the acoustic  
39 cues to infant-directedness cross-culturally robust? (iii) Are human inferences about infant-directedness  
40 aligned to such acoustic cues?

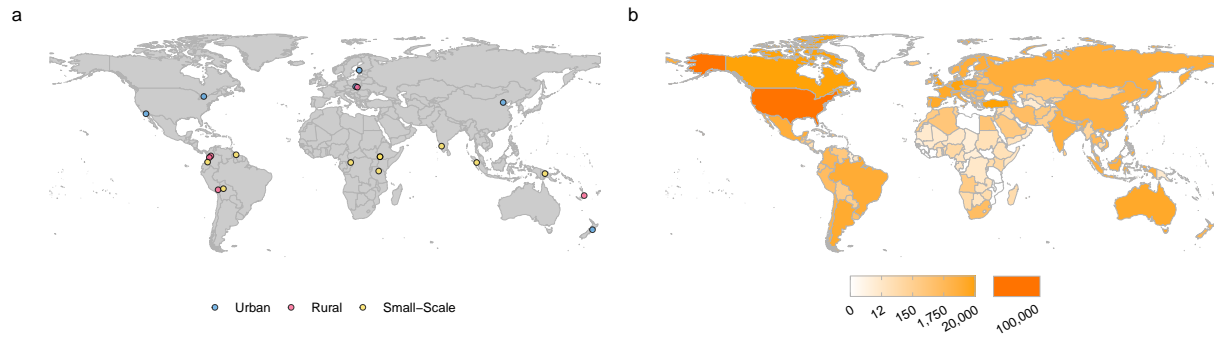

**Fig. 1 | Where vocalizations were recorded and where citizen scientists were recruited.** **a**, We recorded examples of speech and song from 21 urban, rural, or small-scale societies, whose locations are represented by coloured circles. **b**, Participants in the citizen-science experiment, who listened to the vocalizations and guessed whether each was directed toward an adult or to an infant, hailed from many countries; the gradients indicate the total number of vocalization ratings gathered from each country.

| Region        | Sub-Region                 | Society            | Language              | Language family          | Subsistence type   | Population | Distance to city (km) | Children per family | Recordings |
|---------------|----------------------------|--------------------|-----------------------|--------------------------|--------------------|------------|-----------------------|---------------------|------------|
| Africa        | Central Africa             | Mbendjele BaYaka   | Mbendjele             | Niger-Congo              | Hunter-Gatherer    | 61-152     | 120                   | 7                   | 60         |
|               | Eastern Africa             | Hadza              | Hadza                 | Hadza                    | Hunter-Gatherer    | 35         | 80                    | 6                   | 38         |
|               |                            | Nyangatom          | Nyangatom             | Nilotic                  | Pastoralist        | 155        | 180                   | 5.6                 | 56         |
|               |                            | Toposa             | Toposa                | Nilotic                  | Pastoralist        | 250        | 180                   | 5.2                 | 60         |
| Asia          | East Asia                  | Beijing            | Mandarin              | Sino-Tibetan             | Urban              | 21.5M      | 0                     | 1                   | 124        |
|               | South Asia                 | Jenu Kurubas       | Kannada               | Dravidian                | Other              | 2000       | 15                    | 1                   | 80         |
|               | Southeast Asia             | Mentawai Islanders | Mentawai              | Austronesian             | Horticulturalist   | 260        | 120                   | .                   | 60         |
| Europe        | Eastern Europe             | Krakow             | Polish                | Indo-European            | Urban              | 771,069    | 0                     | 1.54                | 44         |
|               |                            | Rural Poland       | Polish                | Indo-European            | Agriculturalists   | 6,720      | 70                    | 1.83                | 55         |
|               | Scandinavia                | Turku              | Finnish & Swedish     | Uralic and Indo-European | Urban              | 186,000    | 0                     | 1.41                | 80         |
| North America | North America              | San Diego          | English (USA)         | Indo-European            | Urban              | 3.3M       | 0                     | 1.7                 | 116        |
|               |                            | Toronto            | English (Canadian)    | Indo-European            | Urban              | 5.9M       | 0                     | 1.5                 | 198        |
| Oceania       | Melanesia                  | Ni-Vanuatu         | Bislama               | Indo-European Creole     | Horticulturalist   | 6,000      | 224                   | 3.78                | 90         |
|               |                            | Enga               | Enga                  | Trans-New Guinea         | Horticulturalist   | 500        | 120                   | 6                   | 22         |
|               | Polynesia                  | Wellington         | English (New Zealand) | Indo-European            | Urban              | 210,400    | 0                     | 1.45                | 228        |
| South America | Amazonia                   | Arawak             | English Creole        | Indo-European            | Other              | 350        | 32                    | 3                   | 48         |
|               |                            | Tsimane            | Tsimane               | Moseten-Tsimane          | Horticulturalist   | 150        | 234                   | 9                   | 51         |
|               |                            | Sapara & Achuar    | Quechua & Achuar      | Quechuan & Jivaroan      | Horticulturalist   | 200        | 205                   | 9                   | 59         |
|               | Central Andes              | Quechua/Aymara     | Spanish               | Indo-European            | Agro-Pastoralist   | 200        | 8                     | 4                   | 49         |
|               | Northwestern South America | Afrocolombians     | Spanish               | Indo-European            | Horticulturalist   | 300-1,000  | 100                   | 6.6                 | 53         |
|               |                            | Colombian Mestizos | Spanish               | Indo-European            | Commercial Economy | 470,000    | 0                     | 3.5                 | 43         |

**Table 1.** Societies from which recordings were gathered.

## 41 Naïve listeners distinguish infant-directed from adult-directed vocalizations

42 We played excerpts from the vocalization corpus to 45,745 people in the “Who’s Listening?” game on  
43 <https://themusiclab.org> (after exclusions; see Methods). The participants resided in 184 countries and  
44 reported speaking 164 native languages. We asked them to judge, quickly, whether each vocalization was  
45 directed to a baby or to an adult (see Methods and Extended Data Fig. 1). We only included recordings  
46 that lacked confounding contextual/background cues (e.g., an audible infant; see Methods). Unless noted  
47 otherwise, all estimates reported here are generated by mixed-effects linear regression, adjusting for fieldsite  
48 (as a random effect), and with  $p$ -values generated via linear combination tests.

49 Corpus-wide, infant-directed speech was far more likely to be rated as infant-directed than was adult-directed  
50 speech from the same voice (Fig. 2a; ID speech = 51%, AD speech = 22%;  $\chi^2(1) = 25.3$ ,  $p < .0001$ ); and  
51 infant-directed song was far more likely to be rated as infant-directed than was adult-directed song from the  
52 same voice (Fig. 2a; ID song = 72%, AD song = 57%;  $\chi^2(1) = 13.58$ ,  $p < .001$ ). These results were robust  
53 to learning effects, as they repeated when only analyzing each participant’s first exposure to a vocalization  
54 in the experiment and listener accuracy increased by only 0.06% after each trial (Extended Data Fig. 2).  
55 They were also robust to post-hoc data trimming decisions, such as excluding recordings with confounding  
56 background noise and/or trials where the listener could likely understand the words in the vocalization  
57 (Extended Data Fig. 3).

58 There was, however, an overall bias toward “baby” responses for songs (67% of all responses were “baby”,  
59 but only 51% of songs were infant-directed) and toward “adult” responses for speech (64% “adult” responses  
60 vs. 56% actually adult-directed), however, which led adult-directed songs to be reliably *mis*-identified as  
61 infant-directed. To quantify sensitivity to infant-directedness independently from this bias, we ran a  $d$ -  
62 prime analysis at the level of each vocalist, i.e., analyzing participants’ ability to identify infant-directedness  
63 within each voice after correcting for response bias. Sensitivity was significantly higher than the chance level  
64 of 0 (speech:  $d' = 1.05$ , 95% CI [0.64, 1.46]; song:  $d' = 0.42$ , 95% CI [0.22, 0.62];  $ps < .0001$ ) implying that  
65 the naïve listeners reliably differentiated between infant- and adult-directed vocalizations across both speech  
66 and song, and with ~2.5 times higher sensitivity in speech.

67 We also analyzed performance in the task within the subset of recordings drawn from each fieldsite. Cross-site  
68 variability was evident, especially in the size of effects (but less so in their direction); we caution that some  
69 fieldsites had small samples, making it impossible to know whether such effects represent true cross-cultural  
70 variability, sampling variability, or both. In 20 of 21 fieldsites, mean “baby” ratings were higher for infant-  
71 directed speech than adult-directed speech (Fig. 2b) and in 17 of 21 fieldsites, mean “baby” ratings were  
72 higher for infant-directed song than adult-directed song (Fig. 2b). In all fieldsites that failed to replicate  
73 the overall pattern in song, however, the mean “baby” rating for infant-directedness was nonetheless above  
74 the chance level of 50%. Fieldsite-wise  $d'$  scores are reported in Extended Data Table 1.

75 Listener sensitivity within each fieldsite was also correlated with a number of society-level characteristics:  
76 rank-order population size (speech:  $\tau = 0.53$ ; song:  $\tau = 0.6$ ), distance from fieldsite to nearest urban center  
77 (speech:  $r = -0.75$ ; song:  $r = -0.49$ ), and number of children per family (speech:  $r = -0.57$ ; song:  $r =$   
78  $-0.8$ ; all  $ps < .001$ ). Each of these predictors were highly correlated with each other (all  $r > 0.6$ ), however,  
79 suggesting that they did not each contribute unique variance. There was no correlation with ratings of how  
80 frequently infant-directed vocalizations were used within each society ( $ps > .4$ ).

81 Tests of cross-cultural variability among *listeners* also revealed strong similarity in the perception of infant-  
82 directedness. On trials where the vocalization being judged was in a closely related language to the native  
83 language of the listener (e.g., when the vocalization was in Spanish and the listener’s native language was  
84 English, which are both Indo-European languages), performance increased only modestly relative to trials  
85 where the language family did not match (e.g., when the vocalization was in Mentawai, an Austronesian  
86 language, and the listener’s native language was Mandarin, a Sino-Tibetan language); the effect was statis-  
87 tically significant but small (difference in  $d' = 0.18$ ,  $p = 0.01$ ; Extended Data Fig. 4). Linguistic relatedness  
88 therefore only accounted for a small amount of variability in naïve listeners’ intuitions of infant-directedness.  
89 More generally, random effects of listener country, gender, and age on sensitivity were all small (each varying  
90 by  $< 1\%$ ), implying cross-demographic consistency in listener intuitions.

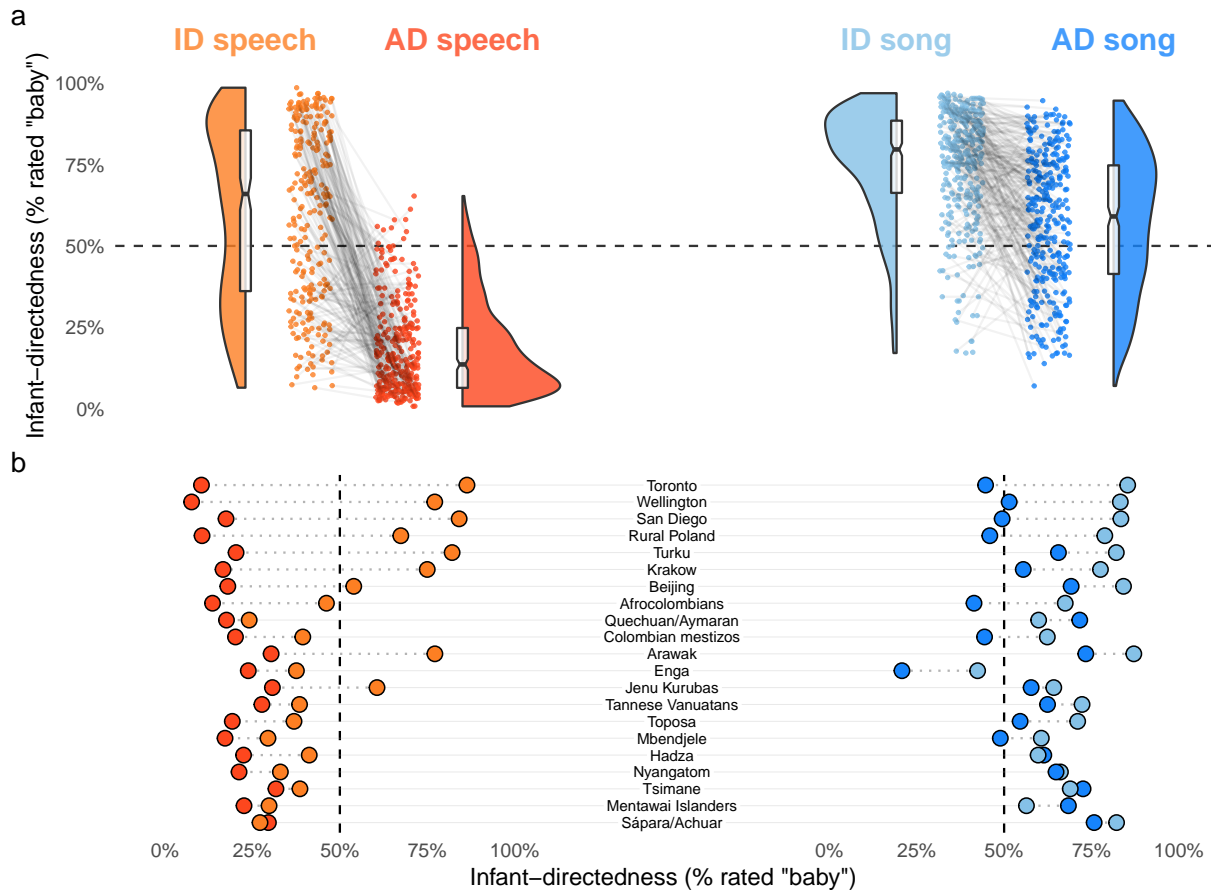

**Fig. 2 | Naïve listeners distinguish infant-directed vocalizations from adult-directed vocalizations across cultures.** **a**, Participants listened to vocalizations drawn at random from the corpus and responded to the prompt “Someone is speaking or singing. Who do you think they are singing or speaking to?” with either “adult” or “baby”. In almost all cases, infant-directed (ID) vocalizations were more frequently rated as “baby” than were adult-directed (AD) vocalizations produced by the same voice. This was true of both speech and song. The points indicate averages for each recording (from a median of 447 ratings per recording; IQR = 152-497; minimum = 96); the gray lines connecting the points indicate the pairs of vocalizations produced by the same voice; the half-violins are kernel density estimations; the box-plots represent the medians, interquartile ranges, and 95% confidence intervals (indicated by the notches); and the horizontal dotted line represents the expected accuracy under random guesses, 50%. Surprisingly, there was an overall bias toward inferring infant-directedness in music, wherein *both* types of song were more likely than chance to be rated as “infant-directed”. Trials where the listener’s native language is the same as the language of the vocalization are excluded, among others; this figure also includes a small amount of supplementary data via a follow-up experiment (see Methods). **b**, The results replicated in most fieldsites, although with varying effect sizes; this may result from sampling variability, true variability in the differences between infant- and adult-directed vocalizations across fieldsites, or both. The circles depict each fieldsite’s mean % infant-directed rating across each of the four vocalization types; with the same color-coding as **a**.



## 91 Acoustic correlates of infant-directedness across cultures

92 What enables such a diverse group of people to arrive at such similar conclusions about unfamiliar, foreign  
93 vocalizations, in languages that they do not understand? One possibility is that there exists a universal set  
94 of acoustic features driving listeners' inferences concerning the intended targets of speech and song, which  
95 are reliably instantiated within and across societies, as suggested by functional accounts of infant-directed  
96 vocalization<sup>33,36–43,46</sup>.

97 To test this possibility, we studied 15 types of acoustic features in each recording (e.g., pitch, rhythm,  
98 timbre) via multiple variables (e.g., median, interquartile range); these were treated to reduce the influence  
99 of atypical observations (e.g., extreme values caused by loud wind, rain, and other background noises), and  
100 standardized within-voices to eliminate between-voice variability. This yielded a total of 99 variables (see  
101 Methods; a codebook is in Extended Data Table 2).

102 Following a preregistered exploratory-confirmatory design, we fitted a multi-level mixed-effects regression  
103 predicting each acoustic variable from the vocalization types, after adjusting for voice and fieldsite as random  
104 effects, and using linear combinations to test for infant-directedness differences in song and speech separately.  
105 To reduce the risk of Type I error, we performed this analysis on a randomly selected half of the corpus  
106 (exploratory, weighting by fieldsite) and only report results that successfully replicated in the other half  
107 (confirmatory). We did not correct for multiple tests because the exploratory-confirmatory design restricts  
108 the tests to those with a directional prediction.\*

109 This procedure identified 16 acoustic features that distinguished infant-directedness in song, speech, or both  
110 (Fig. 3; statistics are in Extended Data Table 3), in the context of producing infant-directed vocalizations  
111 “when baby is fussy”. For example, across cultures and within voices, infant-directed speech had considerably  
112 higher pitch, greater pitch range, and more contrasting vowels than adult-directed speech. These results  
113 repeated consistently in each fieldsite: pitch, energy-rolloff, and inharmonicity showed the same direction  
114 of difference in all 21 fieldsites; and other features, such as vowel contrasts and attack curve slopes, were  
115 consistent in the majority of them (see the doughnut plots in Fig. 3a). These patterns align with prior claims  
116 of pitch and vowel-contrast being robust features of infant-directed speech<sup>23,65</sup>, and substantiate them across  
117 many cultures.

118 The distinguishing features of infant-directed song were more subtle, however, but nevertheless corroborate its  
119 purported soothing functions<sup>33,41,46</sup>: reduced loudness, intensity, and acoustic attack; reduced pitch range;  
120 and purer-sounding vocal qualities (reduced roughness and inharmonicity), which were mostly consistent  
121 across sites. The smaller effects in song, relative to speech, may result from the fact that while solo-  
122 voice speaking is fairly natural and representative of most adult-directed speech (i.e., people rarely speak  
123 at the same time), much of the world's song occurs in social groups where there are multiple singers and  
124 accompanying instruments<sup>32,46,80</sup>. Asking participants to produce solo adult-directed song may have biased  
125 participants toward choosing more soothing and intimate songs (e.g., ballads, love songs; see Extended  
126 Data Table 4), or less naturalistic renditions of songs that would normally be sung in less constrained social  
127 contexts. Further, the adult-directed songs were produced in the presence of an infant, which can in principle  
128 alter participants' singing style<sup>35</sup> (although this may comparably alter the adult-directed speech examples;  
129 see Methods for one test of this question). Thus the distinctiveness of infant-directed song (relative to adult-  
130 directed song) may be underestimated in these data.

131 Some acoustic correlates of infant-directedness had very different trends across language and music. For  
132 example, whereas median pitch strongly differentiated infant-directed speech from adult-directed speech,  
133 it had no such effect in music; pitch variability had the *opposite* effect across language and music; and  
134 similar patterns were evident in first and second formants. Loudness-related features showed a similar

---

\*We note one important deviation from the preregistration: we originally planned post-hoc linear combinations to test hypothesized differences between (1) infant-directed and adult-directed vocalizations overall; (2) infant-directed song and adult-directed song; and (3) infant-directed song and infant-directed speech. We retain the second comparison in the main text, but no longer focus on (1) or (3) as the analysis approach is confounded by the fact that acoustic differences between speech and song overall far outstrip the acoustic correlates of infant-directedness. Instead, we adopted the simpler and more informative approach of post-hoc comparisons that are only within speech and within song. We also retained the exploratory-confirmatory design, as it mitigates the potential for inflated Type I errors. For transparency, we still report the preregistered post-hoc tests in Extended Data Fig. 5, but suggest that these comparisons be interpreted with caution.

135 pattern, where intensity and attack slope were increased in infant-directed speech and decreased in infant-  
136 directed song, on average, and relative to their adult-directed counterparts. That some basic acoustic features  
137 operate differently across infant-directed speech and song supports the possibility of differentiated functional  
138 roles<sup>18,33,34,45,46,79,81</sup>.

139 But some acoustic features were nevertheless common to both language and music; in particular, overall,  
140 infant-directedness was characterized by reduced roughness and inharmonicity, which may facilitate parent-  
141 infant signalling<sup>5,41</sup> through better contrast with the sounds of screaming and crying<sup>17,82</sup>; and increased vowel  
142 contrasts, potentially to aid language acquisition<sup>36,37,39</sup> or as a byproduct of socio-emotional signalling<sup>1,63</sup>.

143 Last, we conducted an exploratory principal components analysis of the full 99 features (Fig. 3b; the analysis  
144 accounts for ~40% of total variability in acoustic features). The results provide convergent evidence that  
145 the main forms of acoustic variation partition into orthogonal clusters distinguishing (PC1) speech from  
146 song overall; (PC2) infant-directedness in song; and (PC1 and PC3) infant-directedness in speech. Factor  
147 loadings are in Extended Data Table 5; they largely replicate the findings of the exploratory-confirmatory  
148 analyses. One further pattern that the principal components analysis highlights is that infant-directedness  
149 makes speech more “songlike”, in terms of higher pitch and reduced roughness (PC3); but speech strongly  
150 differed from song overall in terms of the variability and rate of variability of pitch, intensity, and vowels,  
151 and infant-directedness further exaggerated these differences for speech (PC1).

## 152 **Human intuitions of infant-directedness are modulated by vocalization acoustics**

153 Last, we assessed whether these acoustic features alone are sufficient to replicate human performance in  
154 classifying infant-directedness. To do this, we trained two least absolute shrinkage and selection opera-  
155 tor (LASSO) classifiers<sup>83</sup> with fieldsite-wise leave-one-out cross-validation, separately for speech and song  
156 recordings. This approach<sup>32</sup> gives a strong test of the cross-cultural consistency of acoustical correlates of  
157 infant-directedness, as the model’s classification accuracy is evaluated on held-out data from a fieldsite that  
158 it has not been trained on.

159 Both models performed significantly above the 50% chance level (Fig. 4a; speech: 77% correct, 95% CI [71%,  
160 83%]; song: 65% correct, 95% CI [59%, 71%]). When accounting for response bias, model performance was  
161 highly similar to the aggregate guessing patterns of human listeners, as evaluated via a receiver operating  
162 characteristic analysis (Extended Data Fig. 6), for both speech (human AUC: 90.77, 95% CI [88.41, 93.14];  
163 model AUC: 92.13, 95% CI [90.33, 93.93]) and song (human AUC: 75.52, 95% CI [71.7, 79.33]; model AUC:  
164 77.37, 95% CI [74.14, 80.6]). Using this same bias-free metric, both models also performed similarly to  
165 humans at the level of each individual fieldsite (speech:  $r = 0.38$ ,  $p = 0.04$ ; song:  $r = 0.56$ ,  $p = 0.004$ ;  
166 see Fig. 4a and Extended Data Fig. 7). These results demonstrate that the measured acoustic correlates  
167 of infant-directedness operate reliably across the 21 societies studied, at least with sufficient consistency to  
168 replicate the overall level of human classification performance.

169 We then examined the precise relations between acoustic features and the experiment-wide *proportions* of  
170 infant-directedness ratings for each vocalization, in a similar approach to prior research<sup>73</sup>. The proportions  
171 are a more strenuous target to predict than a binary classification (as in the first two LASSO models) in that  
172 they form a continuous measure of infant-directedness per the ears of the naïve listeners. We trained two  
173 further LASSO models to predict the proportions, using the same cross-validation procedure. Both models  
174 explained considerable variation in human listeners’ intuitions (Fig. 4b; speech  $R^2 = 0.56$ ; song  $R^2 = 0.21$ ,  
175  $ps < .0001$ ), albeit more so in speech than in song.

176 We also measured the relations between the influence of each acoustic cue on human intuitions and the  
177 effect sizes of each variable in the corpus-wide acoustical analyses. If human inferences are attuned to some  
178 universal profile of acoustic correlates of infant-directedness, one might expect a close relationship between  
179 the strength of *actual* acoustic differences between vocalizations on a given feature and the relative influence  
180 of that feature on human intuitions. We compared the variable importance scores from the LASSO model  
181 predicting human inferences (visualized in the bar plots in Fig. 4a) to a measure of how acoustically salient  
182 each feature was (estimated as mean differences in the corpus; Fig. 3). We found a significant positive  
183 relationship for speech ( $r = 0.82$ ,  $p < .001$ ) but not for song ( $r = 0.32$ ,  $p = 0.14$ ), implying that human



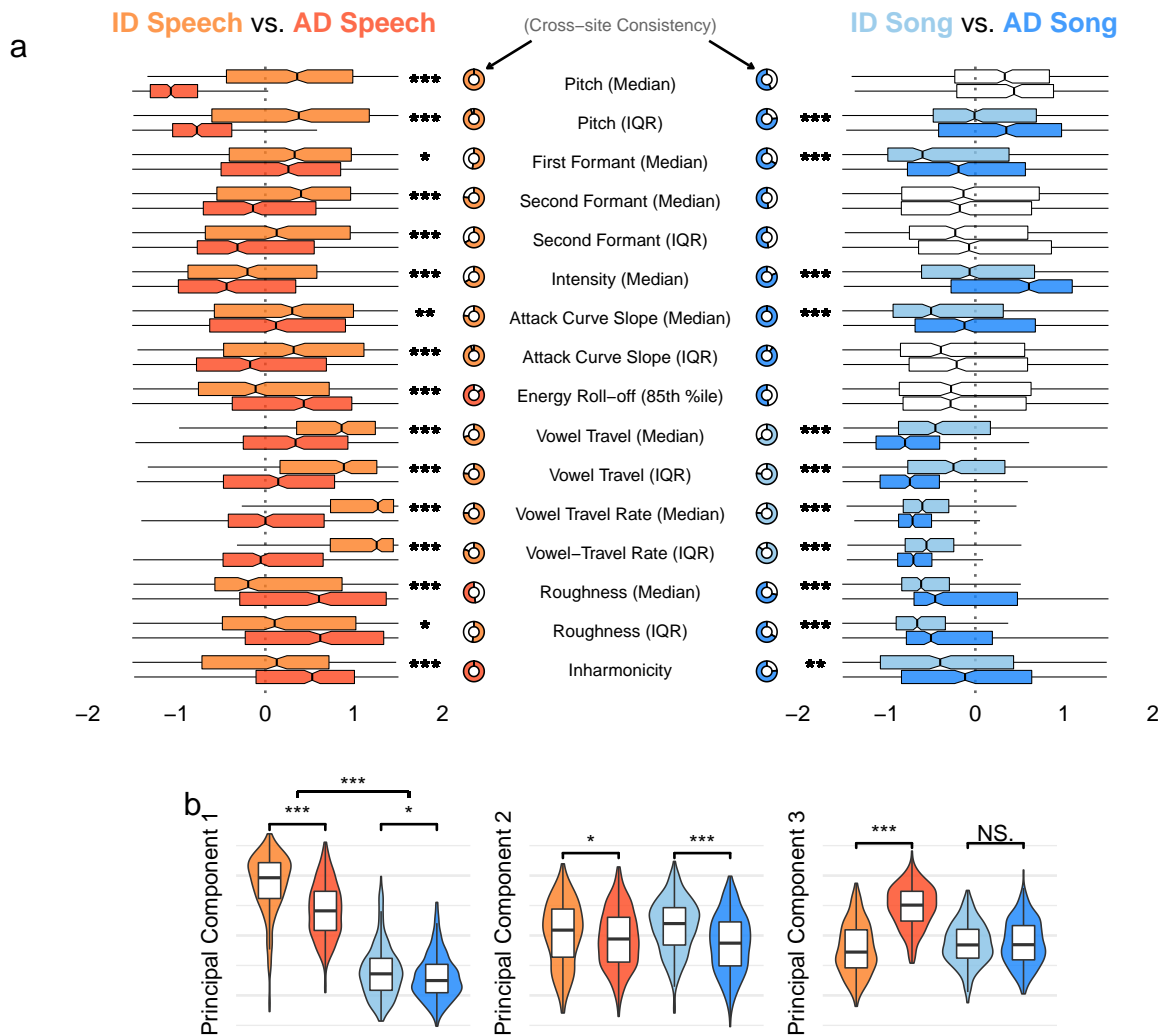

**Fig. 3 | Acoustic correlates of infant-directedness in speech and song.** **a**, Acoustic analyses revealed 16 features with a statistically significant difference between infant-directed and adult-directed vocalizations in speech, song, or both. These features operated differently across speech and song. For example, median pitch was far higher in infant-directed speech than in adult-directed speech in all 21 fieldsites, whereas median pitch was comparable across both forms of song. The boxplots, which are ordered approximately from largest differences between speech and song to smallest, represent each acoustic feature's median (vertical black lines) and interquartile range (boxes); the whiskers indicate  $1.5 \times \text{IQR}$ ; the notches represent the 95% confidence intervals of the medians; and the doughnut plots represent the proportion of fieldsites where the main effect repeated, based on estimates of fieldsite-wise random effects. All acoustic features were normalized within-voices; only comparisons that survived an exploratory-confirmatory analysis procedure are plotted; faded comparisons did not reach significance in confirmatory analyses. Significance values are computed via linear combinations, following multi-level mixed-effects models; \* $p < 0.05$ , \*\* $p < 0.01$ , \*\*\* $p < 0.001$ . Statistics are in Extended Data Table 3. **b**, A principal components analysis on the full 99 acoustic variables independently supports the idea that the acoustic features operate differently in language and music: the first principal component most strongly distinguishes speech from song, overall; the second distinguishes infant-directed from adult-directed *song*; and the third distinguishes infant-directed from adult-directed *speech*. The violins indicate kernel density estimations and the boxplots represent the medians and interquartile ranges. Feature loadings are in Extended Data Table 4.

184 intuitions concerning infant-directed song were likely driven by more subjective features of the recordings,  
185 higher-level acoustic features that we did not measure, or both; this contrasts with intuitions concerning  
186 infant-directed speech, which were largely explicable from simple, objective acoustic features.

## 187 Discussion

188 We provide convergent evidence for cross-cultural regularities in the acoustic design of infant-directed speech  
189 and song. Naïve listeners reliably identified infant-directed vocalizations as infant-directed, despite the fact  
190 that the vocalizations were of largely unfamiliar cultural, geographic, and linguistic origin; acoustic analyses  
191 showed cross-culturally reliable acoustic differentiation of infant-directed and adult-directed vocalizations, in  
192 both speech and song; and these acoustic distinctions explained substantial variability in human intuitions  
193 concerning infant-directedness.

194 Thus, despite evident variability in language, music, and infant care practices worldwide, when people speak  
195 or sing to fussy infants, they modify the acoustic features of their vocalizations in similar and mutually  
196 intelligible ways across cultures. This implies that the forms of infant-directed vocalizations are shaped by  
197 their functions, in a fashion similar to the vocal signals of many non-human species.

198 By analyzing both speech and song recorded from the same voices, we discerned precise differences in  
199 the ways infant-directedness is instantiated in language and music. In response to the same prompt of  
200 addressing a “fussy infant”, infant-directedness in speech and song was instantiated with opposite trends in  
201 acoustic modification (relative to adult-directed speech and song): infant-directed speech was more intense  
202 and contrasting (e.g., more pitch variability, higher intensity) while infant-directed song was more subdued  
203 and soothing (e.g., less pitch variability, lower intensity). These acoustic dissociations suggest functional  
204 dissociations, with speech being more attention-grabbing, the better to distract from baby’s fussiness<sup>37,38</sup>;  
205 and song being more soothing, the better to lower baby’s arousal<sup>32,33,41–43,45,79</sup>. Speech and song are both  
206 capable of playful or soothing roles<sup>60</sup> but each here tended toward one acoustic profile over the other, despite  
207 both types of vocalization being elicited here in the *same* context: vocalizations used “when the baby is fussy”.

208 Many of the reported acoustic differences are consistent with the bioacoustics of vocal signalling in non-human  
209 animals<sup>1–15</sup>. For example, in both speech and song, infant-directedness was robustly associated with purer  
210 and less harsh vocal timbres, and greater formant–frequency dispersion. In non-human animals, these features  
211 have convergently evolved across taxa in the functional context of signalling friendliness or approachability  
212 in close contact calls<sup>1,3,63,84</sup>, in contrast to alarm calls or signals of aggression, which are associated with  
213 rough sounds that have less formant dispersal<sup>4,85–87</sup>. The use of these features in infant care may originate  
214 from signalling approachability to baby, but may have later acquired further functions more specific to the  
215 human context. For example, greater formant–frequency dispersion accentuates vowel contrasts, which could  
216 facilitate language acquisition<sup>36,63,88–90</sup>; and purer vocal timbre may facilitate communication by contrasting  
217 conspicuously with the acoustic context of infant cries<sup>5</sup> (for readers unfamiliar with infants, this context is  
218 acoustically harsh<sup>17,82</sup>).

219 Higher pitch is also routinely a cue for animal vocal signalling of approachability and friendliness; accordingly,  
220 one of the largest and most robust results in our study was that infant-directedness raised the vocal pitch  
221 ( $f_0$ ) of speech to a songlike level. But infant-directedness had no effect on pitch within song. This curious  
222 asymmetry is consistent with the idea that pitched aspects of music may originate from elaborations to generic  
223 infant-directed vocalizations, where both use less harsh but more variable pitch patterns and more temporally  
224 variable and expansive vowel spaces to provide infants with ostensible “flashy” signals of attention and pro-  
225 social friendliness<sup>41,46,61,91,92</sup>. This does not mean that pitch alterations are *absent* from infant-directed song  
226 (indeed, in one study, mothers sang a song at higher pitch when producing a more playful rendition, and a  
227 lower pitch when producing a more soothing rendition<sup>44</sup>), but on average, both infant- and adult-directed  
228 song, along with infant-directed speech, tend to be higher in pitch than adult-directed speech.

229 We leave open at least two further questions. First, the results are suggestive of universality, because the  
230 corpus covers a swath of geographic locations (21 societies on 6 continents), languages (12 language families),  
231 and different subsistence regimes (8 types) (see Table 1). But these do not constitute a representative sample

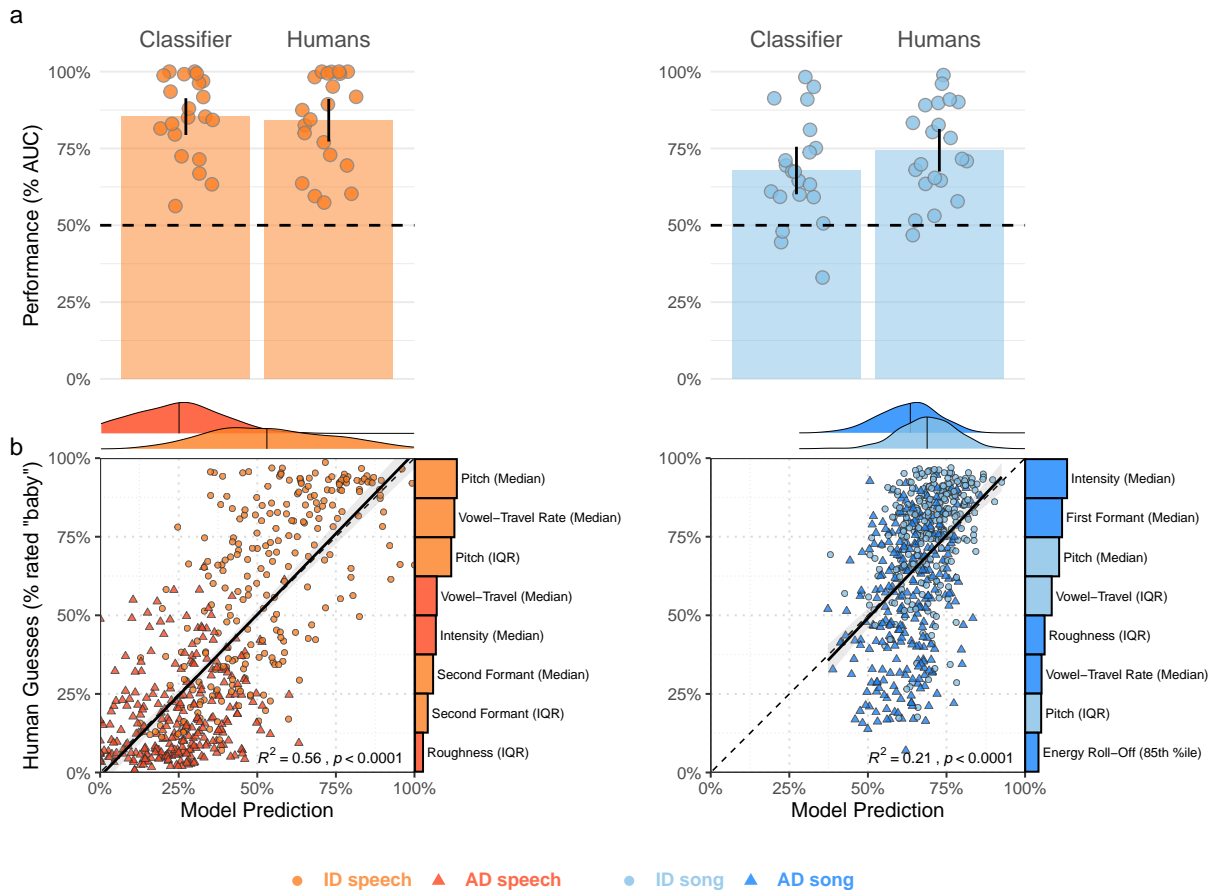

**Fig. 4 | Human inferences about infant-directedness are predictable from acoustic features of vocalizations.** **a**, We trained two Least absolute shrinkage and selection operator (LASSO) models, one for speech and one for song, to classify whether recordings were infant-directed or adult-directed on the basis of the 16 acoustic features identified by our exploratory-confirmatory analysis. These predictors were then regularized using cross-validation across fieldsites. The bars represent the overall classification performance averaged across fieldsites (quantified via receiver operating characteristic/area under the curve; AUC) for both the classifier and for the humans in the naïve-listener experiment; the error bars represent 95% confidence intervals; and the points represent the average performance for each fieldsite. **b**, Two further LASSO models were trained using the same procedure, predicting the *percentage* of “baby” responses for each recording from the human listeners. Each point represents a recorded vocalization, plotted in terms of the model’s estimated infant-directedness of the model and the average “infant-directed” rating from the naïve listeners; the barplots depict the relative explanatory power of the top 8 acoustical features in each LASSO model, showing which features were most strongly associated with human inferences (the colors indicate whether each feature was higher in value for ID or AD); the dotted diagonal lines represent a hypothetical perfect match between model predictions and human guesses; the solid black lines depict linear regressions; the grey ribbons represent the standard errors of the mean, from the regressions; and the shaded regions represent kernel density estimations of the distribution of model estimates for the vocalization types plotted in each panel (with vertical black lines depicting the medians).

232 of humans, so strong claims of universality are not justified; indeed, we found both cross-cultural consistency  
233 and variability (e.g., with the fieldsite in Wellington, New Zealand demonstrating main effects an order  
234 of magnitude larger than some other fieldsites). In addition to studying more representative samples of  
235 infant-directed vocalizations; other future approaches may (i) use phylogenetic methods to examine whether  
236 people in societies that are distantly related nonetheless produce similar infant-directed vocalizations; (ii)  
237 test perceived infant-directedness in more diverse samples of listeners, to more accurately characterize cross-  
238 cultural variability in the *perception* of infant-directedness; and (iii) test listener intuitions among groups  
239 with reduced exposure to a given set of infant-directed vocalizations, such as very young infants or people  
240 from isolated, distantly related societies, as in related efforts<sup>27,67,93</sup>. Such research would benefit in particular  
241 from a focus on societies previously reported to have unusual vocalization practices, infant care practices,  
242 or both<sup>53,56-58</sup>; and would also clarify the extent to which convergent practices across cultures are due to  
243 cultural borrowing (in the many cases where societies are not fully isolated from the influence of global  
244 media).

245 Second, speech and song are used in a multiple contexts with infants, of which “addressing a fussy infant”  
246 (the type of vocalization we elicited from participants) is just one<sup>18,34</sup>. One curious finding may bear on  
247 this question: naïve listeners displayed a bias toward “adult” guesses for speech and “baby” guesses for  
248 song, regardless of their actual targets. This suggests that listeners treated “adult” and “baby” as the  
249 default reference levels for speech and song, respectively, against which acoustic evidence was compared,  
250 a pattern consistent with theories that posit song as having a special connection to infant care in human  
251 psychology<sup>33,46</sup>.

## 252 **Methods**

### 253 **Vocalization corpus**

254 We built a corpus of 1,615 recordings of infant-directed song, infant-directed speech, adult-directed song,  
255 and adult-directed speech (all audio is available at <https://doi.org/10.5281/zenodo.5525161>). Participants  
256 ( $N = 411$ ) living in 21 societies (Fig. 1a and Table 1) produced each of these vocalizations, respectively,  
257 with a median of 15 participants per society (range: 6-57). From those participants for whom information  
258 was available, most were female (86%) and nearly all were parents or grandparents of the focal infant (95%).

259 Recordings were collected by principal investigators and/or staff at their field sites, all using the same data  
260 collection protocol. They translated instructions to the native language of the participants, following the  
261 standard research practices at each site. There was no procedure for screening out participants, but we  
262 encouraged our collaborators to collect data from parents rather than non-parents. Fieldsites were selected  
263 partly by convenience (i.e., via recruiting principal investigators at fieldsites with access to infants and  
264 caregivers) and partly to maximize cross-fieldsite diversity (see Table 1).

265 For infant-directed song and infant-directed speech, participants were asked to sing and speak to their infant  
266 as if they were fussy, where “fussy” could refer to anything from frowning or mild whimpering to a full  
267 tantrum. At no fieldsites were difficulties reported in the translation of the English word “fussy”, suggesting  
268 that participants understood it. For adult-directed speech, participants spoke to the researcher about a topic  
269 of their choice (e.g., they described their daily routine). For adult-directed song, participants sang a song  
270 that was not intended for infants; they also stated what that song was intended for (e.g., “a celebration  
271 song”). The record collection protocol is posted at <https://github.com/themusiclab/infant-speech-song>.

272 For most participants (90%) an infant was physically present during the recording (the infants were 48%  
273 female; age in months:  $M = 11.4$ ;  $SD = 7.61$ ; range 0.5-48). When an infant was not present, participants  
274 were asked to imagine that they were vocalizing to their own infant or grandchild, and simulated their  
275 infant-directed vocalizations. Prior research has shown that simulated infant-directedness is qualitatively  
276 similar, albeit less exaggerated than when authentic, for both speech<sup>94</sup> and song<sup>35</sup>. Indeed, a model of the  
277 naïve listener results adjusting for fieldsite indeed showed a small decrease in “baby” guesses when an infant

278 was not present (ID song: 7.1%, ID speech: 8.4%, AD song: 6.5%, AD speech: 4.3%,  $ps < .0001$ ), and this  
279 effect was stronger for vocalizations that were infant-directed than adult-directed ( $\chi^2(1) = 5.67$ ,  $p = 0.02$ ).  
280 Both the naive listener results and acoustic analyses were robust to whether these simulated infant-directed  
281 vocalizations were included or excluded, however.

282 In all cases, participants were free to determine the content of their vocalizations. This was intentional:  
283 imposing a specific content category on their vocalizations (e.g., “sing a *lullaby*”) would likely alter the  
284 acoustic features of their vocalizations, which are known to be influenced by experimental contexts<sup>95</sup>. Some  
285 participants produced adult-directed songs that shared features with the intended soothing nature of the  
286 infant-directed songs; data on the intended behavioral context of each adult-directed song are in Extended  
287 Data Table 4.

288 All recordings were made with Zoom H2n digital field recorders, using foam windscreens (where available). To  
289 ensure that participants were audible along with researchers (who stated information about the participant  
290 and environment before and after the vocalizations), recordings were made with a 360° dual  $x$ - $y$  microphone  
291 pattern. This produced two uncompressed stereo audio files (WAV) per participant at 44.1 kHz; we only  
292 analyzed audio from the two-channel file on which the participant was loudest.

293 The principal investigator at each fieldsite also provided standardized background data on the behavior  
294 and cultural practices of the society (e.g., whether there was access to mobile-phones/TV/radio, and how  
295 commonly people used ID speech or song in their daily lives). Most items were based on variables included  
296 in the D-PLACE cross-cultural corpus<sup>96</sup>. Complete data are posted on the project GitHub repository.

297 The 21 societies varied widely in their characteristics, from cities with millions of residents (Beijing) to  
298 small-scale hunter-gatherer groups of as few as 35 people (Hadza). All of the small-scale societies studied had  
299 limited access to TV, radio, and the internet, mitigating against the influence of exposure to the music and/or  
300 infant care practices of other societies. Four of the small-scale societies (Nyangatom, Toposa, Sápara/Achuar,  
301 and Mbendjele) were completely without access to these communication technologies.

302 The societies also varied in the prevalence of infant-directed speech and song in day-to-day life. The only site  
303 reported to lack infant-directed song in contemporary practice was the Quechuan/Aymaran site, although it  
304 was also noted that people from this site know infant-directed songs in Spanish and use other vocalizations  
305 to calm infants. Conversely, the Mbendjele BaYaka were noted to use infant-directed song, but rarely used  
306 infant-directed speech. In most sites, the frequency of infant-directed song and speech varied. For example,  
307 among the Tsimane, song is reportedly infrequent in the context of infant care; when it appears, however, it  
308 is specifically used to soothe and encourage infants to sleep.

## 309 Naïve listener experiment

310 We analyzed all data available at the time of writing this manuscript from the “Who’s Listening?” game at  
311 <https://themusiclab.org/quizzes/ids>, a continuously running jsPsych<sup>97</sup> experiment distributed via Pushkin<sup>98</sup>.  
312 A total of 63,481 participants began the experiment, the first in January 2019 and the last in October 2021.

313 We played participants vocalizations from a subset of the corpus, excluding those that were less than 10  
314 seconds in duration ( $n = 113$ ) and those with confounding sounds that were not produced by the target  
315 voice in the first 5 seconds of the recording (e.g., a crying baby or laughing adult in the background;  $n$   
316 = 364), as determined by two independent annotators who remained unaware of vocalization type and  
317 fieldsite (with disagreements resolved by discussion). We also excluded trials where the native language  
318 of the listener matched the language of the vocalization ( $N = 85,968$  of 709,628 trials, or 12.1%), as this  
319 could enable listeners to infer whether a vocalization was infant-directed independently of the vocalization’s  
320 acoustic characteristics. Robustness checks confirmed that the data trimming decisions did not substantially  
321 alter the results (Extended Data Fig. 3). Irrespective of the recordings each participant was assigned, we  
322 also excluded participants who reported having previously participated in the same experiment ( $n = 3,514$ );  
323 participants who reported being younger than 12 years old ( $n = 1,340$ ); and those who reported having a  
324 hearing impairment ( $n = 1,201$ ).



325 This yielded a sample of 45,745 participants (gender: 20,664 female, 24,126 male, 922 other, 33 did not  
326 disclose; age: median 22 years, interquartile range 18-29). Participants self-reported living in 184 different  
327 countries (Fig. 1b) and speaking 164 different native languages; roughly half the participants were native  
328 English speakers from the United States.

329 Participants listened to at least 1 and at most 16 vocalizations drawn from the subset of the corpus (as they  
330 were free to leave the experiment before completing it) for a total of 388,985 ratings (Fig. 1b; infant-directed  
331 song:  $n = 109,994$ ; infant-directed speech:  $n = 77,317$ ; adult-directed song:  $n = 104,023$ ; adult-directed  
332 speech:  $n = 97,651$ ). The vocalizations were selected with weighted randomization, such that a set of 16 trials  
333 included 4 vocalizations in English and 12 in other languages; roughly half the corpus was English-language  
334 vocalizations, so this method ensured that participants heard a substantial number of vocalizations in other  
335 languages. This yielded over 46 ratings per vocalization (median = 447; interquartile range 151-496.75) and  
336 thousands of ratings for each society (median = 18,631; interquartile range: 12,100-21,393).

337 We asked participants to classify each vocalization as either directed toward a baby or an adult (Extended  
338 Data Fig. 1), as quickly as possible, either by pressing a key corresponding to a drawing of an infant or adult  
339 face (when the participant used a desktop computer) or by tapping one of the faces (when the participant  
340 used a tablet or smartphone). The locations of the faces (left vs. right on a desktop; top vs. bottom on a  
341 tablet or smartphone) were randomized participant-wise. As soon as they made a choice, playback stopped.  
342 After each trial, we told participants whether or not they had answered correctly and how long, in seconds,  
343 they took to respond; at the end of the experiment, we gave participants a total score and percentile rank  
344 (relative to other participants).

345 In revising this manuscript, we discovered that a small subset of the corpus had been erroneously excluded  
346 from the main experiment. In most cases, these were recordings that had been too-conservatively edited to  
347 be too short to include in the experiment (but could reasonably be edited to include longer sections of audio);  
348 in some other cases, the original excerpting included confounding background noises that, upon additional  
349 editing, were avoidable. To ensure maximal coverage of the fieldsites studied here, we re-excerpted the audio  
350 of 103 examples and collected supplemental naïve listener data on these recordings via a Prolific experiment  
351 ( $N = 97$ , 54 male, 42 female, 1 other, mean age = 29.7 years). The Prolific experiment was identical to the  
352 citizen-science experiment, except that each participant was paid (at US\$15/hr) rather than volunteering;  
353 and each participant rated 188 instead of up to 16. In addition to the erroneously excluded recordings, we  
354 included in the Prolific experiment 85 additional recordings randomly selected from those that *were* included  
355 in the citizen-science experiment, ensuring that each Prolific participant heard an exactly balanced set of  
356 vocalization types. The two cohorts' ratings of the recordings in common across the two experiments were  
357 highly correlated ( $r = 0.95$ ,  $p < .0001$ ), demonstrating that they had similar intuitions concerning infant-  
358 directedness in speech and song. As such, in the main text, we report all the ratings together without  
359 disambiguating between the cohorts.

## 360 Acoustic feature extraction

361 We manually extracted the longest continuous and uninterrupted section of audio from each of the four  
362 samples per participant (i.e., isolating vocalizations by the participant from interruptions from other speakers,  
363 the infant, and so on), using Adobe Audition. We then used the silence detection tool in Praat<sup>99</sup>, with  
364 minimum sounding intervals at 0.1 seconds and minimum silent intervals at 0.3 seconds, to remove all  
365 portions of the audio where the participant was not speaking (i.e., the silence between vocalization phrases).  
366 These were manually concatenated in Python, producing denoised recordings, which were subsequently  
367 checked manually to ensure minimal loss of content.

368 We extracted and subsequently analyzed acoustic features using Praat<sup>99</sup>, MIRtoolbox<sup>100</sup>, temporal mod-  
369 ularity using discrete Fourier transforms for rhythmic variability<sup>101</sup>, and normalized pairwise variability  
370 indices<sup>102</sup>. These features consisted of measurements of pitch (e.g.,  $F_0$ , the fundamental frequency), timbre  
371 (e.g., roughness), and rhythm (e.g., tempo); all summarized over time: producing 99 variables in total. We  
372 standardized feature values within-voices, eliminating between-voice variability. In the main acoustic anal-  
373 yses (Fig. 3a), we restricted the variable set to 26 summary statistics of median and interquartile range,



374 as these correlated highly with other summary statistics (e.g., maximum, range) but were less sensitive to  
375 extreme observations. The principal components analysis (Fig. 3b) used the full variable set of 99 variables.

## 376 **Praat**

377 We extracted intensity, pitch, and first and second formant values from the denoised recordings every 0.03125  
378 seconds. For male participants, the pitch floor was set at 75 Hz, with a pitch ceiling at 300 Hz, and a  
379 maximum formant of 5000 Hz. For female participants, these values were 100 Hz, 600 Hz, and 5500 Hz,  
380 respectively. From these data, several summary values were calculated per recording: mean and maximum  
381 first and second formants, mean pitch, and minimum intensity. In addition to these summary statistics, we  
382 measured the intensity and pitch rates as change in these values over time. For vowel measures, the first  
383 and second formants were used to calculate both the average vowel space used, as well as the vowel change  
384 rate (measured as change in Euclidean formant space) over time.

## 385 **MIRtoolbox**

386 All MIRtoolbox (v. 1.7.2) features were extracted with default parameters<sup>100</sup>. *mirattackslope* returns a list of  
387 all attack slopes detected, so final analyses were done on summary features (e.g., mean, median, etc.). Final  
388 analyses were also done on summary features for *mirroughness*, which returns time series data of roughness  
389 measures in 50ms windows. We RMS-normalized the mean of *mirroughness* following<sup>103</sup>. MIRtoolbox  
390 features were computed on the denoised recordings, with the exception of *mirtempo* and *mirpulseclarity*,  
391 where removing the silences between vocalizations would have altered the tempo.

## 392 **Rhythmic variability**

393 For temporal modulation spectra we followed Ding's<sup>104</sup> method, which combines discrete Fourier transforms  
394 applied to contiguous six-second excerpts. To analyze the entirety of each recording, we appended all  
395 recordings with silence to be exact multiples of six-seconds. The location of the peak (Hz) and variance of  
396 the temporal modulation spectra were extracted from their RMS values.

## 397 **Normalized pairwise variability index**

398 The nPVI represents the temporal variance of data with discrete events, which makes it especially useful for  
399 comparing speech and music<sup>101</sup>. We used an automated syllable- and phrase-detection algorithm to extract  
400 events<sup>102</sup>. We computed nPVI in two ways: by averaging the nPVI of each phrase within a recording, as  
401 well as by treating the entire recording as a single phrase. Because intervening silence would influence both  
402 temporal modulation and nPVI measures, we used recordings before they had been denoised.

## 403 **Outlier preprocessing**

404 Because automated acoustic analyses are highly sensitive at extremes (e.g., impossible values caused by non-  
405 vocal sounds, like loud wind), we Winsorized all variables. This process arbitrarily defines outliers as being  
406 those exceeding the lowest and highest 5 percentile ranks, recoding them as precisely the values of those  
407 percentile boundaries. These data were used for all acoustic analyses. This decision had no impact on the  
408 interpretation of results, but is preferable to trimming extreme values<sup>105</sup>; pilot analyses using an alternate  
409 method, imputing extreme values with the mean observation for each feature within each fieldsite, yielded  
410 comparable results.

## 411 End notes

### 412 Data, code, and materials availability

413 A fully reproducible manuscript; data, analysis code, and visualizations; other materials; and code for the  
414 naïve listener experiment are available at <https://github.com/themusiclab/infant-speech-song>. The audio  
415 corpus is available at <https://doi.org/10.5281/zenodo.5525161>. The preregistration for the auditory analyses  
416 is at <https://osf.io/5r72u>. Readers may participate in the naïve listener experiment by visiting [https://](https://themusiclab.org/quizzes/ids)  
417 [themusiclab.org/quizzes/ids](https://themusiclab.org/quizzes/ids).

### 418 Acknowledgments

419 This research was supported by the Harvard University Department of Psychology (M.M.K. and S.A.M.);  
420 the Harvard College Research Program (H.L.R.); the Harvard Data Science Initiative (S.A.M.); the Na-  
421 tional Institutes of Health Director’s Early Independence Award DP5OD024566 (S.A.M. and C.B.H.); the  
422 Academy of Finland Grant 298513 (J.A.); the Royal Society of New Zealand Te Apārangi Rutherford Dis-  
423 covery Fellowship RDF-UOA1101 (Q.D.A., T.A.V.); the Social Sciences and Humanities Research Council of  
424 Canada (L.K.C.); the Polish Ministry of Science and Higher Education grant N43/DBS/000068 (G.J.); the  
425 Fogarty International Center (P.M., A.S., C.D.P.); the National Heart, Lung, and Blood Institute, and the  
426 National Institute of Neurological Disorders and Stroke Award D43 TW010540 (P.M., A.S.); the National  
427 Institute of Allergy and Infectious Diseases Award R15-AI128714-01 (P.M.); the Max Planck Institute for  
428 Evolutionary Anthropology (C.T.R., C.M.); a British Academy Research Fellowship and Grant SRG-171409  
429 (G.D.S.); the Institute for Advanced Study in Toulouse, under an Agence nationale de la recherche grant,  
430 Investissements d’Avenir ANR-17-EURE-0010 (L.G., J. Stieglitz); the Fondation Pierre Mercier pour la Sci-  
431 ence (C.S.); and the Natural Sciences and Engineering Research Council of Canada (S.E.T.). We thank the  
432 participants and their families for providing recordings; L. Sugiyama, for supporting pilot data collection; J.  
433 Du, E. Pillsworth, P. Wiessner, and J. Ziker, who collected or attempted to collect additional recordings; S.  
434 Atwood, A. Bergson, Z. Jurewicz, D. Li, L. Lopez, E. Radytė, and S. Ccari Cutipa for research assistance;  
435 and J. Kominsky, L. Powell, and L. Yurdum for feedback on the manuscript.

### 436 Author contributions

- 437 • S.A.M. and M.M.K. conceived of the research, provided funding, and coordinated the recruitment of  
438 collaborators and creation of the corpus.
- 439 • S.A.M. and M.M.K. designed the protocol for collecting vocalization recordings with input from D.A.,  
440 who piloted it in the field.
- 441 • L.G., A.G., G.J., C.T.R., M.B.N., A.M., L.K.C., S.E.T., J. Song, M.K., A.S., T.A.V., Q.D.A., J.A.,  
442 P.M., A.S., C.D.P., G.D.S., S.K., M.S., S.A.C., J.Q.P., C.S., J. Stieglitz, C.M., R.R.S., and B.M.W  
443 collected the field recordings.
- 444 • S.A.M., C.M.B., and J. Simson designed and implemented the online experiment.
- 445 • C.J.M. and H.L.R. processed all recordings and designed the acoustic feature extraction with S.A.M.  
446 and M.M.K.; C.M.B. provided associated research assistance.
- 447 • C.M. designed the fieldsite questionnaire with assistance from M.B. and C.J.M., who collected the data  
448 from the principal investigators.
- 449 • C.B.H. and S.A.M. led analyses, with additional contributions from C.J.M., M.B., and D.K., and  
450 M.M.K.
- 451 • C.B.H. and S.A.M. designed the figures.
- 452 • C.B.H. wrote computer code, with contributions from S.A.M., C.J.M., and M.B.
- 453 • C.J.M., H.L.R., M.M.K., and S.A.M. wrote the initial manuscript.
- 454 • C.B.H. and S.A.M. wrote the revision, with contributions from C.J.M. and M.B., and all authors  
455 approved it.

## 456 **Ethics**

457 Informed consent was obtained from all participants. Ethics approval for the naïve listener experiment was  
458 provided by the Committee on the Use of Human Subjects, Harvard University's Institutional Review Board  
459 (protocol #IRB17-1206). Ethics approval for the collection of recordings and their use in research was  
460 decentralized; each collaborating research arranged ethics approval with their local institution.

## 461 **Additional information**

462 The authors declare no competing interests.

463 **Supplementary information** is available for this paper.

464 **Correspondence and requests for materials** should be addressed to S.A.M.

## 465 Supplementary Information

a

**Who's Listening?**

Someone is speaking or singing. Who do you think they are singing or speaking to?

Press **F** for adult or **J** for baby.

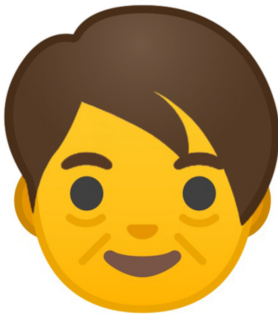

F

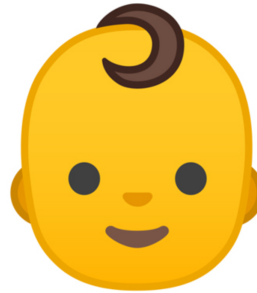

J

Try to answer as quickly as you can!

b

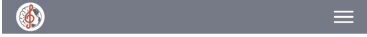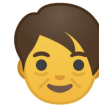

Someone is speaking or singing. Who do you think they are singing or speaking to?

Tap the character being sung to!

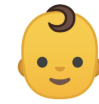

© 2019-2021 [Leave feedback](#)

**Extended Data Fig. 1 | Screenshots from the naïve listener experiment.** On each trial, participants heard a randomly selected vocalization from the corpus and were asked to quickly guess to whom the vocalization was directed: an adult or a baby. The experiment used large emoji and was designed to display comparably on desktop computers (a) or tablets/smartphones (b).

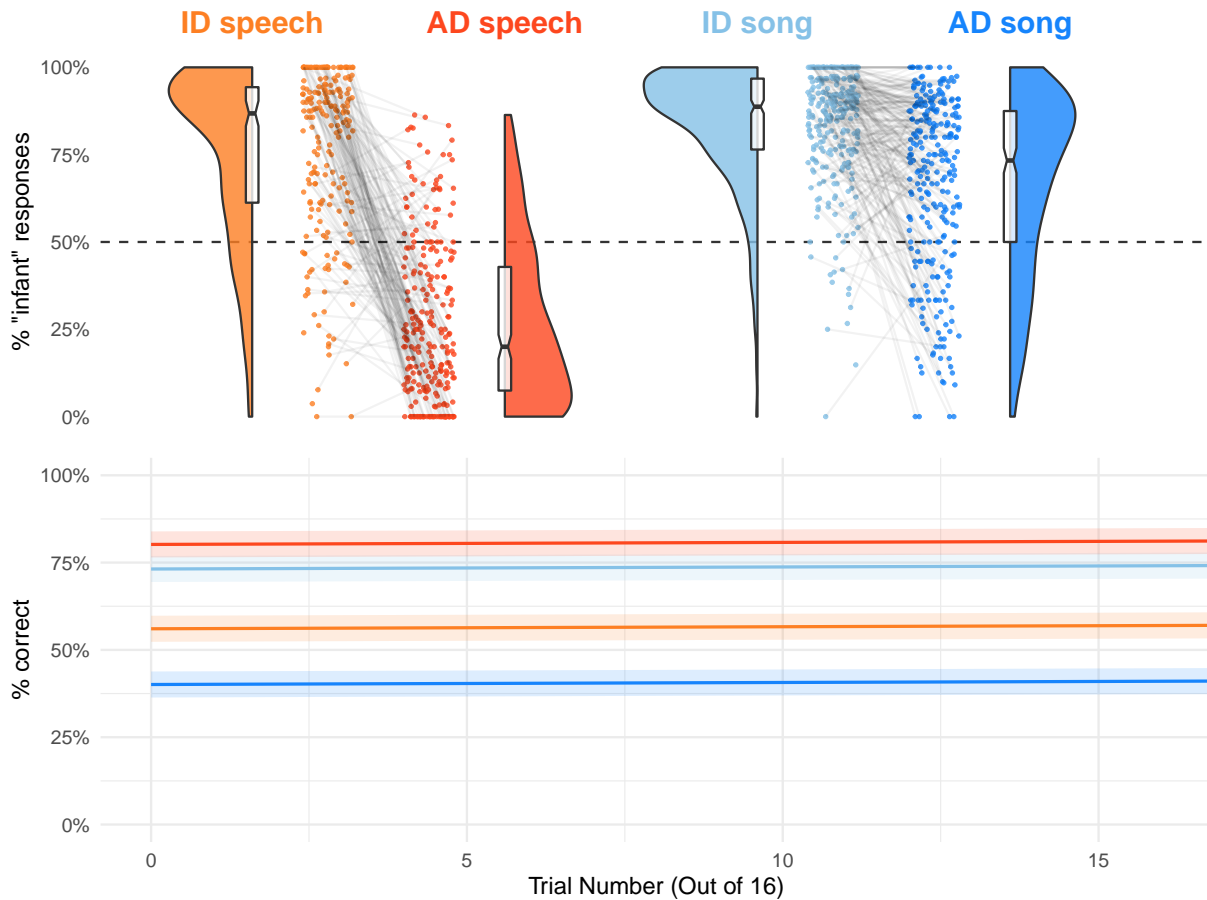

**Extended Data Fig. 2 | The main effects in the naïve listener experiment are not attributable to learning.** **a**, This panel repeats Fig. 2a, but only uses data from each participant's first trial, to avoid the possibility of any learning effects over the course of their participation. See further details in the caption to Fig. 2a. **b**, Over the course of multiple trials in the experiment, which contained corrective feedback, participants' accuracy was estimated to increase by only 0.06% per trial ( $p < .001$ ).

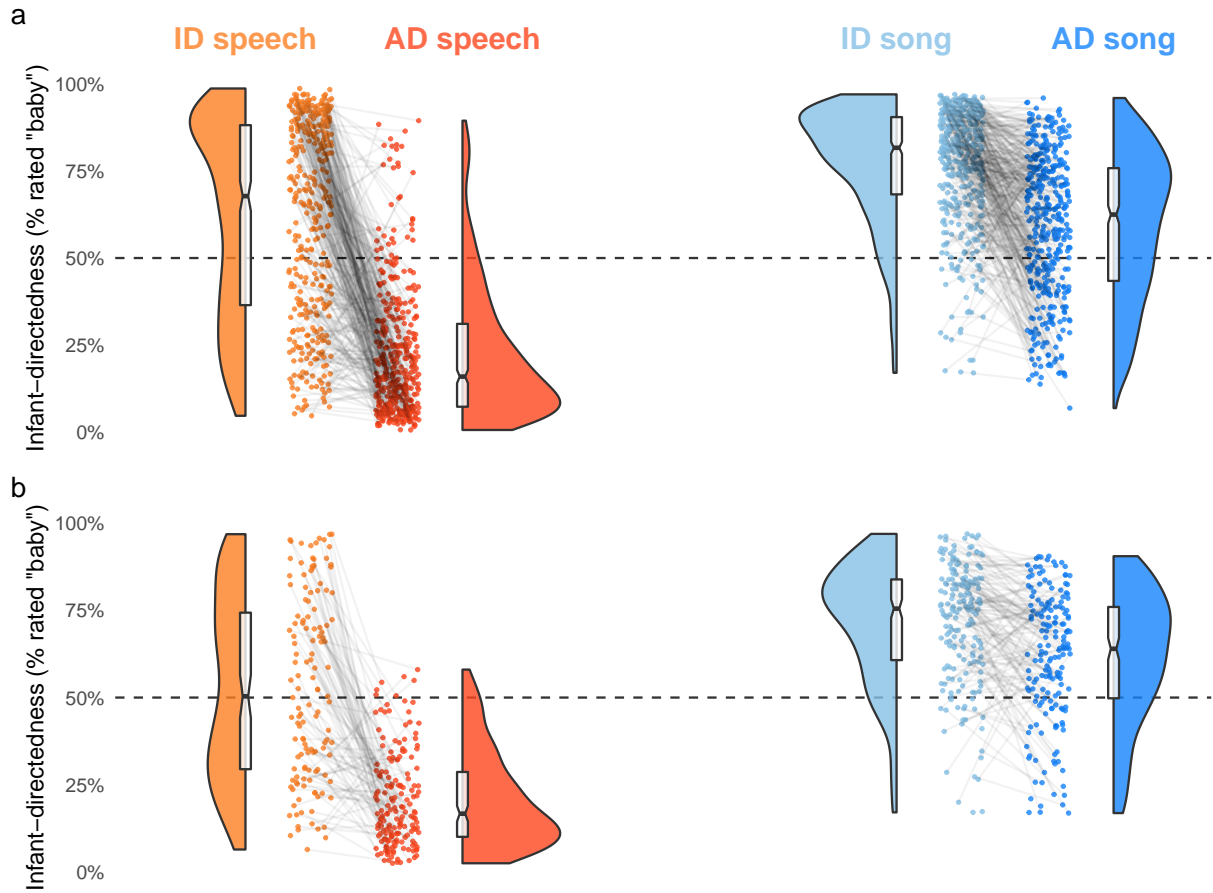

**Extended Data Fig. 3 | The main effects in the naïve listener experiment are robust to alternative exclusion criteria. a**, This panel repeats Fig. 2a, but including analysis of *all* recordings, even those that have audible confounds (e.g., a crying infant). **b**, This panel again repeats Fig. 2a, but excluding all English-language recordings (i.e., mostly from the Wellington, Toronto and San Diego sites). In both cases, the main effects repeat. See further details in the caption to Fig. 2a.



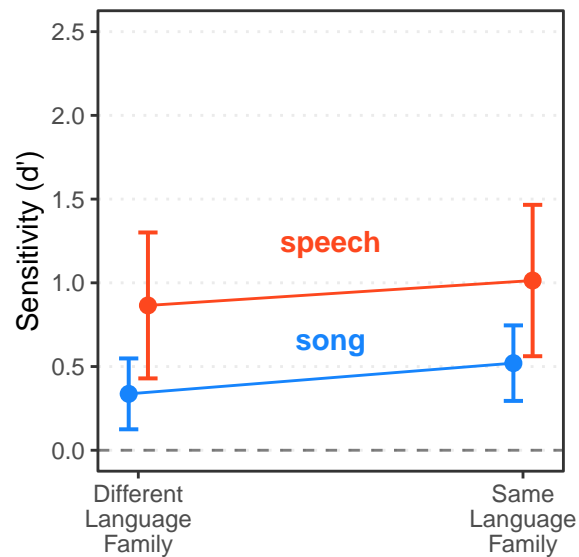

**Extended Data Fig. 4 | Relation between listener language and vocalist language is minimally predictive of sensitivity to infant-directedness.** We split all trials from the main experiment into two groups: those where the native language of the listener was in the same Glottolog language family as the language of the vocalization excerpt (but was not the same language;  $n = 270,221$ ), and those that were not ( $n = 110,565$ ). The plot shows the estimated marginal effects of a mixed-effects model predicting  $d$ -prime values across language and music examples, after adjusting for fieldsite. Relatedness had only a modest effect on identification accuracy.

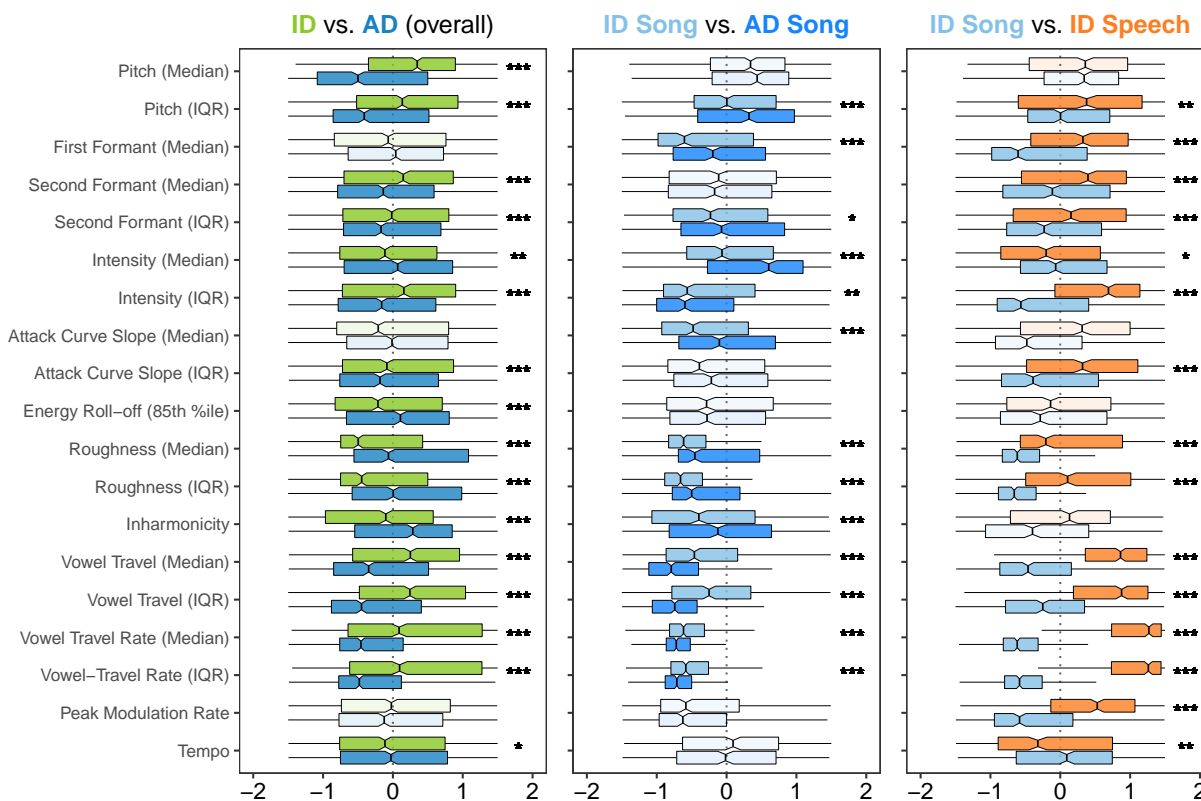

**Extended Data Fig. 5 | Exploratory-confirmatory selected acoustic features for pre-registered analyses.** The preregistered analyses included comparisons of the acoustic features of infant-directed vocalizations, regardless of whether they included speech or song. For the reasons discussed in the Main Text and Footnote 1, and per the results reported in Fig. 3, these results should be interpreted with caution, as direct comparisons of acoustic features across modalities (language vs. music) may be spurious or may hide underlying variation within each modality. The boxplots show the 25 acoustic features with a significant difference in at least one main comparison (e.g., infant-directed song vs. infant-directed speech, in the right panel), in both the exploratory and confirmatory analyses. All variables are normalized across participants. The boxplots represent the median and interquartile range; the whiskers indicate  $1.5 \times$  IQR; and the notches represent the 95% confidence intervals of the medians. Faded comparisons did not reach significance in exploratory analyses. Significance values are computed via linear combinations, following multi-level mixed-effects models;  $*p < 0.05$ ,  $**p < 0.01$ ,  $***p < 0.001$ . Prespecified hypotheses about each comparison are posted in the project GitHub repository.

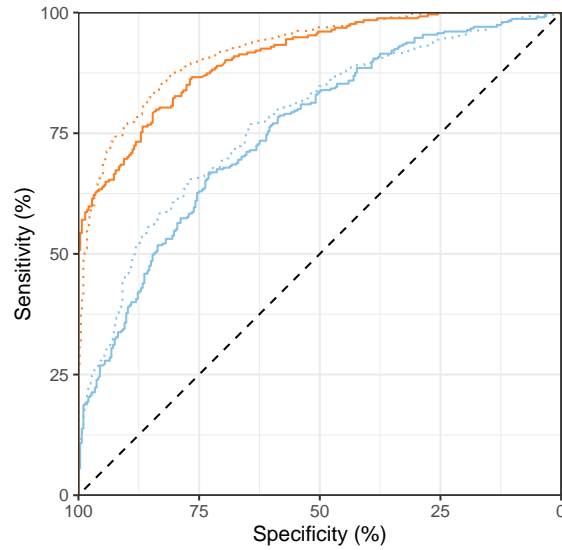

**Extended Data Fig. 6 | Machine classifier and naïve listeners perform similarly.** Receiver operator characteristic curves show a close match between the model and naïve listeners, after accounting for response bias. The dotted lines represent the model and the solid lines represent human performance, for both speech (orange) and song (blue). The area under the curve values (AUC) visualized in Fig. 4 are derived from this ROC curve; they summarize performance as a single value as the area under the curve.

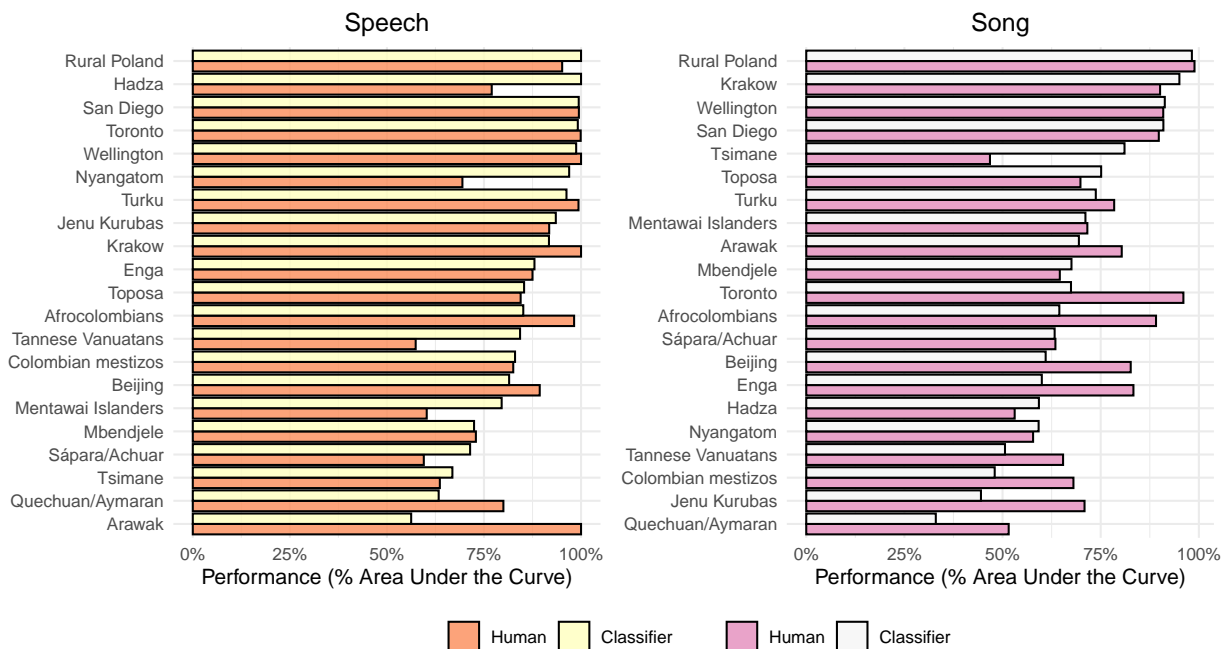

**Extended Data Fig. 7 | Comparison of machine classifier and naïve listener performance across field sites.** The bar graphs summarize the models' accuracy for classifying infant-directedness in speech and song, using the same receiver operator characteristic curve approach reported in Fig. 4 and Extended Data Fig. 6, but disambiguated across the 21 field sites.

| Fieldsite          | Speech |                |             | Song   |                |     |
|--------------------|--------|----------------|-------------|--------|----------------|-----|
|                    | $d'$   | 95% CI         | n vocalists | $d'$   | 95% CI         | $n$ |
| Mentawai Islanders | 0.048  | [-0.389 0.486] | 6           | -0.085 | [-0.304 0.133] | 13  |
| Tannese Vanuatans  | -0.008 | [-0.676 0.66]  | 2           | 0      | [-0.297 0.296] | 10  |
| Tsimane            | 0.234  | [0.038 0.43]   | 11          | 0.037  | [-0.103 0.178] | 12  |
| Sápara/Achuar      | 0.051  | [-0.257 0.36]  | 10          | 0.052  | [-0.137 0.242] | 11  |
| Mbendjele          | 0.252  | [-0.053 0.558] | 3           | 0.111  | [-0.073 0.295] | 10  |
| Quechuan/Aymaran   | 0.530  | [0.168 0.891]  | 3           | 0.143  | [-0.064 0.35]  | 6   |
| Hadza              | 0.551  | [0.239 0.862]  | 10          | 0.152  | [-0.044 0.348] | 9   |
| Nyangatom          | 0.519  | [0.045 0.993]  | 5           | 0.175  | [-0.049 0.398] | 7   |
| Toposa             | 0.580  | [0.212 0.948]  | 8           | 0.24   | [0.049 0.43]   | 6   |
| Jenu Kurubas       | 0.877  | [0.465 1.289]  | 10          | 0.306  | [0.087 0.525]  | 11  |
| Enga               | 0.849  | [0.437 1.261]  | 2           | NA     | NA             | 0   |
| Colombian mestizos | 0.920  | [0.257 1.583]  | 5           | 0.396  | [0.061 0.731]  | 7   |
| Beijing            | 1.184  | [0.684 1.684]  | 26          | 0.48   | [0.234 0.727]  | 28  |
| Afrocolombians     | 1.188  | [0.883 1.494]  | 4           | 0.539  | [0.355 0.723]  | 9   |
| Arawak             | 1.526  | [1.181 1.871]  | 1           | 0.605  | [0.398 0.811]  | 6   |
| Krakow             | 1.781  | [1.588 1.975]  | 7           | 0.707  | [0.561 0.854]  | 7   |
| Turku              | 1.981  | [1.688 2.273]  | 16          | 0.729  | [0.55 0.909]   | 14  |
| Rural Poland       | 1.722  | [1.474 1.97]   | 10          | 0.747  | [0.58 0.915]   | 7   |
| San Diego          | 2.329  | [2.061 2.597]  | 13          | 0.99   | [0.825 1.155]  | 17  |
| Wellington         | 2.363  | [1.834 2.893]  | 20          | 1.006  | [0.769 1.244]  | 26  |
| Toronto            | 2.563  | [2.343 2.784]  | 27          | 1.135  | [0.99 1.28]    | 23  |

**Extended Data Table 1.**  $d'$ -prime values quantifying sensitivity to infant-directedness in speech and song, independent of response bias, for each fieldsite. Values are estimated as random coefficients from mixed-effects model predicting  $d'$  from vocalization type, with random effects of fieldsite for each vocalization type.  $n$  refers to the number of vocalists that had a complete pair of vocalizations in the listener experiment (e.g., where one or both of the infant- and adult-directed vocalizations were not excluded due to confounds).

| Feature           | Variables                                                            | Label                  | Description                                                                                                                                                                                                                                                                                                                                     | Significance                                                                                                                                               |
|-------------------|----------------------------------------------------------------------|------------------------|-------------------------------------------------------------------------------------------------------------------------------------------------------------------------------------------------------------------------------------------------------------------------------------------------------------------------------------------------|------------------------------------------------------------------------------------------------------------------------------------------------------------|
| id                |                                                                      | filename               |                                                                                                                                                                                                                                                                                                                                                 |                                                                                                                                                            |
| mir_attack        | Mean, Med, StD, Range, Min, Max, 1st Quart, 3rd Quart, IQR, Distance | Attack Curve Slope     | MIRtoolbox detects acoustic events in the audio; for a subset of those it can compute an attack slope from amplitude curves, which is the slope of the line from the beginning of the event to its peak.                                                                                                                                        | The slope of an attack curve provides a relative measure of "alerting components," or immediately discriminable beginnings of a vocalization.              |
| mir_roughness     | Mean, Med, StD, Range, Max, 1st Quart, 3rd Quart, IQR, Distance      | Roughness              | A roughness value produced by computing the peaks of the audio spectrum and taking the average of the dissonance between all possible pairs of peaks; following Buyens et al. (2017), we reduce this to a single measure by taking the RMS-normalized mean.                                                                                     | Along with inharmonicity, roughness provides one measure of dissonance in a recording. Roughness similarly provides at least one measure of vocal clarity. |
| mir_rolloff85     | Whole                                                                | 85th Energy Percentile | An estimate of the amount of high frequency in a signal measured by the frequency such that a 85% of the total energy is contained below it.                                                                                                                                                                                                    | The 85th energy percentile allows a comparison of relative measures of high-frequency acoustics in a vocalization.                                         |
| mir_inharmonicity | Whole                                                                | Inharmonicity          | An estimate of the inharmonicity in the signal produced by identifying the number of partials that are not multiples of the fundamental frequency (i.e. those outside of the ideal harmonic range).                                                                                                                                             | Along with roughness, inharmonicity provides a more precise measure of dissonance in a vocalization.                                                       |
| mir_tempo         | Whole                                                                | Tempo                  | A tempo estimate made by detecting periodicities from MIR's event detection curves. Outputs a single number.                                                                                                                                                                                                                                    | Tempo allows assessment of the speed or pace of a vocalization.                                                                                            |
| mir_pulseclarity  | Whole                                                                | Pulse Clarity          | Estimates the rhythmic clarity, or strength of the beats (Lartillot et al. 2008).                                                                                                                                                                                                                                                               | Pulse clarity provides a measure of the vocal clarity of a speaker or emphasis on individual utterances.                                                   |
| npvi_total        | Whole                                                                | nPVI Recording         | The nPVI equation measures the "average degree of durational contrast between adjacent events in a sequence" (Daniele & Patel, 2015). This makes it especially useful for comparing rhythmic units across language and music (i.e., syllables vs. notes). To automatically detect events, we used Mertens' (2004) syllable detection algorithm. | By providing a measure of durational contrast, npvi_total is a measure of rhythmic complexity in a recording.                                              |
| npvi_phrase       | Whole                                                                | nPVI Phrase            | In addition to detecting syllables, Mertens' algorithm detects phrases. Whereas npvi_total computes nPVI based on the whole file as a continuous phrase, this measure computes the nPVI for each detected phrase and reports the mean. In other words, it excludes the distances between the ends and beginnings of phrases.                    | npvi_phrase provides a more granular measure of rhythmic complexity, within phrases, rather than between them.                                             |



(continued)

| Feature               | Variables                                                            | Label                   | Description                                                                                                                                                                                                                                                                                                                                                                                                                                                                                                                                                | Significance                                                                                                                                                                                                                     |
|-----------------------|----------------------------------------------------------------------|-------------------------|------------------------------------------------------------------------------------------------------------------------------------------------------------------------------------------------------------------------------------------------------------------------------------------------------------------------------------------------------------------------------------------------------------------------------------------------------------------------------------------------------------------------------------------------------------|----------------------------------------------------------------------------------------------------------------------------------------------------------------------------------------------------------------------------------|
| tm_std_hz             | StD                                                                  | Temporal Modulation     | The temporal modulation spectrum is the frequency decomposition of the amplitude envelope of a signal. This measures how loud something is at any given moment. We then measure how fast the loudness changes. For example: if someone sings a note every second, the spectrum will have a peak at 1Hz. If someone sings a note three times a second, but with an emphasis every three seconds, there will be a large peak at 1Hz, and a smaller peak at 3Hz. The standard deviation of the spectrum is taken as a measure of how exaggerated the peak is. | The standard deviation of temporal modulation allows for an assessment of rhythmic variability in a recording, with a lower standard deviation leaning towards more monorhythmic signals.                                        |
| praat_f0              | Mean, Med, StD, Range, Min, Max, 1st Quart, 3rd Quart, IQR           | Pitch                   | The fundamental frequency (f0) in Hertz for each recording                                                                                                                                                                                                                                                                                                                                                                                                                                                                                                 | Pitch provides a fundamental measure of the highness or lowness, in frequency, of an utterance. Likewise, the shape of the pitch curve and the overall value of pitch is a common discriminable feature in both speech and song. |
| praat_f0travel        | Mean, Med, StD, Range, Max, 1st Quart, 3rd Quart, IQR                | Pitch Space             | The distance between f0 at each .03125/sec interval to the next.                                                                                                                                                                                                                                                                                                                                                                                                                                                                                           | Pitch space provides a dynamic measure of pitch's range over time.                                                                                                                                                               |
| praat_pitch_rate      | Whole, Med, IQR                                                      | Pitch Rate              | The pitch rate is a measure of pitch change over time. In essence, the pitch rate provides a measure of pitch curve smoothness (a lower value corresponds to a smoother curve).                                                                                                                                                                                                                                                                                                                                                                            | The pitch rate provides a measure of how smooth or variable pitch is over time.                                                                                                                                                  |
| praat_vowtrav         | Mean, Med, StD, Range, Max, 1st Quart, 3rd Quart, IQR                | Vowel Space             | The Euclidian distance travelled in vowel space. This is equivalent to distance between the two formants.                                                                                                                                                                                                                                                                                                                                                                                                                                                  | Vowel space provides a measure of how much of the possible complex vowel space is used.                                                                                                                                          |
| praat_vowtrav_rate    | Whole, Med, IQR                                                      | Vowel Space Travel Rate | The Euclidian distance travelled in vowel space over a rate of time. This is equivalent to distance between two formants divided by rate of time.                                                                                                                                                                                                                                                                                                                                                                                                          | Vowel travel rate provides a measure of how much of the vowel space is used over time, a relative measure of acoustic "flashiness" of a signal.                                                                                  |
| praat_intensity       | Mean, Med, StD, Range, Min, Max, 1st Quart, 3rd Quart, IQR, Distance | Amplitude               | A measure of amplitude (loudness) in decibels                                                                                                                                                                                                                                                                                                                                                                                                                                                                                                              | Amplitude provides a measure of how loud or quiet a vocalization is and can be compared between types within speakers                                                                                                            |
| praat_intensitytravel | Mean, Med, StD, Range, Max, 1st Quart, 3rd Quart, IQR                | Amplitude Space         | The distance between amplitude at each .03125/sec interval to the next.                                                                                                                                                                                                                                                                                                                                                                                                                                                                                    | Intensity space provides a dynamic measure of intensity's range over time.                                                                                                                                                       |
| praat_intensity_rate  | Whole, Med, IQR                                                      | Amplitude Rate          | A measure of decay in intensity curves in each recording measured as change in amplitude over time.                                                                                                                                                                                                                                                                                                                                                                                                                                                        | The intensity rate provides a measure of how loud or soft amplitude changes over time.                                                                                                                                           |
| praat_f1              | Mean, Med, StD, Range, Min, Max, 1st Quart, 3rd Quart, IQR           | 1st Formant             | The frequency in Hertz of the 1st formant at each (.03125/sec) point                                                                                                                                                                                                                                                                                                                                                                                                                                                                                       | 1st formants are the 1st in a harmonic series following from the fundamental frequency and is important for a number of acoustic reasons.                                                                                        |

(continued)

| Feature          | Variables                                                  | Label                      | Description                                                             | Significance                                                                                                                                                           |
|------------------|------------------------------------------------------------|----------------------------|-------------------------------------------------------------------------|------------------------------------------------------------------------------------------------------------------------------------------------------------------------|
| praat_f2         | Mean, Med, StD, Range, Min, Max, 1st Quart, 3rd Quart, IQR | Second Formant             | The frequency in Hertz of the second formant at each (.03125/sec) point | Second formants are the second in a harmonic series following from the fundamental frequency, and along with the 1st formant, is used by listeners to perceive vowels. |
| meta_length      |                                                            | File duration              | The length of the unedited sound files                                  |                                                                                                                                                                        |
| meta_edit_length |                                                            | Concatenated file duration | The length of the concatenated versions of the sound files              |                                                                                                                                                                        |

**Extended Data Table 2.** Codebook for acoustic features. Variable names are stubs, i.e., in the datasets, suffixes are added to denote summary statistics. Abbreviations: infant-directed (ID); adult-directed (AD).

| Comparison                | Feature                   | Statistic            | $\beta$ | $SE$   | $z$    | $p$    |
|---------------------------|---------------------------|----------------------|---------|--------|--------|--------|
| ID Speech vs. AD Speech   | Pitch (F0)                | Inter-Quartile Range | 0.996   | 0.063  | 15.937 | <0.001 |
|                           | First Formant             | Median               | 0.169   | 0.067  | 2.518  | 0.012  |
|                           | Intensity                 | Median               | 0.393   | 0.067  | 5.877  | <0.001 |
|                           | Attack Curve Slope        | Median               | 0.214   | 0.067  | 3.175  | 0.001  |
|                           | Acoustic Roughness        | Median               | -0.262  | 0.065  | -4.040 | <0.001 |
|                           | Inharmonicity             | Whole                | -0.288  | 0.066  | -4.345 | <0.001 |
|                           | Acoustic Roughness        | Inter-Quartile Range | -0.153  | 0.062  | -2.469 | 0.014  |
|                           | Vowel Travel              | Median               | 0.200   | 0.054  | 3.675  | <0.001 |
|                           |                           | Inter-Quartile Range | 0.287   | 0.058  | 4.954  | <0.001 |
|                           | Vowel-Travel Rate         | Median               | 0.764   | 0.048  | 15.979 | <0.001 |
|                           |                           | Inter-Quartile Range | 0.775   | 0.049  | 15.891 | <0.001 |
|                           | Pitch (F0)                | Median               | 1.250   | 0.055  | 22.829 | <0.001 |
|                           | Second Formant            | Median               | 0.305   | 0.068  | 4.461  | <0.001 |
|                           |                           | Inter-Quartile Range | 0.297   | 0.069  | 4.321  | <0.001 |
| Attack Curve Slope        | Inter-Quartile Range      | 0.372                | 0.068   | 5.485  | <0.001 |        |
| ID Song vs. AD Song       | Energy Roll-off (85 %ile) | Whole                | -0.340  | 0.068  | -5.016 | <0.001 |
|                           | Pitch (F0)                | Inter-Quartile Range | -0.099  | 0.028  | -3.520 | <0.001 |
|                           | First Formant             | Median               | -0.111  | 0.030  | -3.690 | <0.001 |
|                           | Intensity                 | Median               | -0.206  | 0.030  | -6.878 | <0.001 |
|                           | Attack Curve Slope        | Median               | -0.145  | 0.030  | -4.829 | <0.001 |
|                           | Acoustic Roughness        | Median               | -0.140  | 0.029  | -4.831 | <0.001 |
|                           | Inharmonicity             | Whole                | -0.091  | 0.030  | -3.068 | 0.002  |
|                           | Acoustic Roughness        | Inter-Quartile Range | -0.128  | 0.028  | -4.617 | <0.001 |
|                           | Vowel Travel              | Median               | 0.185   | 0.024  | 7.589  | <0.001 |
|                           |                           | Inter-Quartile Range | 0.224   | 0.026  | 8.617  | <0.001 |
|                           | Vowel-Travel Rate         | Median               | 0.081   | 0.021  | 3.800  | <0.001 |
|                           |                           | Inter-Quartile Range | 0.094   | 0.022  | 4.290  | <0.001 |
|                           | Pitch (F0)                | Median               | -0.034  | 0.025  | -1.388 | 0.165  |
|                           | Second Formant            | Median               | 0.012   | 0.031  | 0.400  | 0.689  |
|                           | Inter-Quartile Range      | -0.059               | 0.031   | -1.923 | 0.054  |        |
| Attack Curve Slope        | Inter-Quartile Range      | -0.046               | 0.030   | -1.515 | 0.130  |        |
| Energy Roll-off (85 %ile) | Whole                     | 0.005                | 0.030   | 0.174  | 0.862  |        |

**Extended Data Table 3.** Regression results from confirmatory analyses (corresponding with Fig. 3). The features tested here were limited to those with significant differences in the exploratory analyses. Statistics are from post-hoc linear combinations following multi-level mixed-effects models. Abbreviations: infant-directed (ID); adult-directed (AD).

| Song type                   | Number of songs |
|-----------------------------|-----------------|
| Love Song                   | 21              |
| Caring song                 | 3               |
| Sad Song                    | 3               |
| Ballad                      | 2               |
| Hanging out before bed song | 1               |
| Lullaby                     | 1               |
| Orphan song                 | 1               |
| Past remembrance song       | 1               |
| Religious ballad            | 1               |
| Song about island home      | 1               |

**Extended Data Table 4.**

Adult-directed songs with descriptions rated as "soothing" by two independent annotators. A mixed-effects model estimating the difference in perceived infant-directedness across these vs. other adult-directed songs, adjusting for field-site-wise variability, found no statistically significant difference in responses ( $b = -0.011, p = .13$ ).

| Principal Component 1              |           | Principal Component 2         |           | Principal Component 3          |           |
|------------------------------------|-----------|-------------------------------|-----------|--------------------------------|-----------|
| Feature                            | Weighting | Feature                       | Weighting | Feature                        | Weighting |
| praat_intensitytravel_mean         | -0.198    | praat_intensity_mean          | 0.262     | praat_f0_mean                  | -0.310    |
| praat_intensitytravel_rate_median  | -0.197    | praat_intensity_median        | 0.257     | praat_f0_third_quart           | -0.304    |
| praat_f0travel_rate_IQR            | -0.197    | praat_intensity_third_quart   | 0.254     | praat_f0_median                | -0.296    |
| praat_f0_travel_rate_default       | -0.195    | praat_intensity_first_quart   | 0.235     | praat_f0_first_quart           | -0.256    |
| praat_intensitytravel_rate_IQR     | -0.192    | mir_roughness_3q              | 0.220     | praat_f0_IQR                   | -0.217    |
| praat_intensitytravel_median       | -0.187    | mir_roughness_iqr             | 0.219     | mir_roughness_1q               | 0.197     |
| praat_f0travel_third_quart         | -0.185    | mir_roughness_std             | 0.202     | mir_roughness_med              | 0.174     |
| praat_f0travel_IQR                 | -0.185    | mir_roughness_med             | 0.198     | praat_f0_std                   | -0.164    |
| praat_intensitytravel_first_quart  | -0.185    | praat_intensity_max           | 0.181     | praat_intensitytravel_range    | -0.147    |
| praat_intensitytravel_rate_default | -0.185    | mir_roughness_range           | 0.171     | praat_intensitytravel_max      | -0.147    |
| praat_intensitytravel_third_quart  | -0.184    | mir_roughness_max             | 0.171     | praat_f0travel_first_quart     | -0.142    |
| praat_voweltravel_rate_median      | -0.181    | praat_intensity_min           | 0.167     | praat_intensity_third_quart    | -0.142    |
| praat_f0travel_mean                | -0.180    | mir_roughness_mean            | 0.163     | mir_roughness_mean             | 0.139     |
| praat_intensitytravel_IQR          | -0.178    | praat_f1_first_quart          | 0.154     | praat_intensity_mean           | -0.137    |
| praat_voweltravel_rate_IQR         | -0.177    | mir_roughness_1q              | 0.144     | praat_intensity_median         | -0.136    |
| praat_voweltravel_rate_default     | -0.175    | praat_voweltravel_IQR         | -0.135    | mir_roughness_3q               | 0.134     |
| praat_f0travel_rate_median         | -0.174    | praat_voweltravel_third_quart | -0.131    | mir_roughness_iqr              | 0.129     |
| praat_voweltravel_mean             | -0.167    | praat_f1_std                  | -0.130    | mir_rolloff85                  | 0.127     |
| praat_intensitytravel_std          | -0.158    | praat_f2_third_quart          | -0.128    | praat_intensity_first_quart    | -0.123    |
| praat_voweltravel_median           | -0.158    | praat_f2_mean                 | -0.126    | tm_std_hz                      | -0.115    |
| praat_voweltravel_first_quart      | -0.157    | praat_intensitytravel_max     | 0.125     | tm_std_idx                     | -0.115    |
| praat_voweltravel_std              | -0.155    | praat_intensitytravel_range   | 0.124     | mir_inharmonicity              | 0.114     |
| praat_f0travel_std                 | -0.149    | praat_f1_min                  | 0.123     | praat_f0_max                   | -0.108    |
| praat_f0travel_median              | -0.149    | praat_f2_median               | -0.121    | praat_f2_IQR                   | -0.108    |
| praat_voweltravel_third_quart      | -0.149    | praat_f1_range                | -0.117    | praat_intensity_max            | -0.106    |
| praat_voweltravel_IQR              | -0.140    | praat_f1_median               | 0.116     | praat_f2_min                   | 0.103     |
| praat_intensity_IQR                | -0.125    | praat_voweltravel_mean        | -0.116    | praat_intensitytravel_std      | -0.102    |
| tm_peak_hz                         | -0.111    | praat_f2_range                | -0.116    | praat_f1_mean                  | 0.100     |
| tm_peak_idx                        | -0.111    | praat_f2_max                  | -0.114    | praat_f2_std                   | -0.098    |
| npvi_total                         | 0.100     | praat_f1_max                  | -0.102    | praat_voweltravel_rate_default | -0.096    |

**Extended Data Table 5.** Factor loadings of the top three principal components reported in Main Text Fig. 3.

## 466 References

- 467 1. Morton, E. S. On the occurrence and significance of motivation-structural rules in some bird and  
468 mammal sounds. *The American Naturalist* **111**, 855–869 (1977).
- 469 2. Endler, J. A. Some general comments on the evolution and design of animal communication systems.  
470 *Philosophical Transactions of the Royal Society B: Biological Sciences* **340**, 215–225 (1993).
- 471 3. Owren, M. J. & Rendall, D. Sound on the rebound: Bringing form and function back to the forefront  
472 in understanding nonhuman primate vocal signaling. *Evolutionary Anthropology* **10**, 58–71 (2001).
- 473 4. Fitch, W. T., Neubauer, J. & Herzel, H. Calls out of chaos: The adaptive significance of nonlinear  
474 phenomena in mammalian vocal production. *Animal Behaviour* **63**, 407–418 (2002).
- 475 5. Wiley, R. H. The evolution of communication: Information and manipulation. *Animal Behaviour* **2**,  
476 156–189 (1983).
- 477 6. Krebs, J. & Dawkins, R. Animal signals: Mind-reading and manipulation. in *Behavioural Ecology:  
478 An Evolutionary Approach* (eds. Krebs, J. & Davies, N.) 380–402 (Blackwell, 1984).
- 479 7. Karp, D., Manser, M. B., Wiley, E. M. & Townsend, S. W. Nonlinearities in meerkat alarm calls  
480 prevent receivers from habituating. *Ethology* **120**, 189–196 (2014).
- 481 8. Slaughter, E. I., Berlin, E. R., Bower, J. T. & Blumstein, D. T. A test of the nonlinearity hypothesis  
482 in great-tailed grackles (*Quiscalus mexicanus*). *Ethology* **119**, 309–315 (2013).
- 483 9. Wagner, W. E. Fighting, assessment, and frequency alteration in Blanchard’s cricket frog. *Behavioral  
484 Ecology and Sociobiology* **25**, 429–436 (1989).
- 485 10. Ladich, F. Sound production by the river bullhead, *Cottus gobio* L. (Cottidae, Teleostei). *Journal of  
486 Fish Biology* **35**, 531–538 (1989).
- 487 11. Filippi, P. *et al.* Humans recognize emotional arousal in vocalizations across all classes of terrestrial  
488 vertebrates: Evidence for acoustic universals. *Proceedings of the Royal Society B: Biological Sciences*  
**284**, (2017).
- 489 12. Lingle, S. & Riede, T. Deer mothers are sensitive to infant distress vocalizations of diverse mammalian  
490 species. *The American Naturalist* **184**, 510–522 (2014).
- 491 13. Custance, D. & Mayer, J. Empathic-like responding by domestic dogs (*Canis familiaris*) to distress in  
492 humans: An exploratory study. *Animal Cognition* **15**, 851–859 (2012).
- 493 14. Magrath, R. D., Haff, T. M., McLachlan, J. R. & Iqic, B. Wild birds learn to eavesdrop on heterospe-  
494 cific alarm calls. *Current Biology* **25**, 2047–2050 (2015).
- 495 15. Lea, A. J., Barrera, J. P., Tom, L. M. & Blumstein, D. T. Heterospecific eavesdropping in a nonsocial  
496 species. *Behavioral Ecology* **19**, 1041–1046 (2008).
- 497 16. Piantadosi, S. T. & Kidd, C. Extraordinary intelligence and the care of infants. *Proceedings of the  
498 National Academy of Sciences* **113**, 6874–6879 (2016).
- 499 17. Soltis, J. The signal functions of early infant crying. *Behavioral and Brain Sciences* **27**, 443–458  
500 (2004).
- 501 18. Fernald, A. Human maternal vocalizations to infants as biologically relevant signals: An evolution-  
ary perspective. in *The adapted mind: Evolutionary psychology and the generation of culture* (eds.  
502 Barkow, J. H., Cosmides, L. & Tooby, J.) 391–428 (Oxford University Press, 1992).

- 503 19. Burnham, E., Gamache, J. L., Bergeson, T. & Dilley, L. Voice-onset time in infant-directed speech  
504 over the first year and a half. in **19**, 060094 (ASA, 2013).
- 505 20. Fernald, A. & Mazzie, C. Prosody and focus in speech to infants and adults. *Developmental Psychology*  
506 **27**, 209–221 (1991).
- 507 21. Ferguson, C. A. Baby talk in six languages. *American Anthropologist* **66**, 103–114 (1964).  
508
- 509 22. Audibert, N. & Falk, S. Vowel space and f0 characteristics of infant-directed singing and speech. in  
510 *Proceedings of the 19th international conference on speech prosody* 153–157 (2018).
- 511 23. Kuhl, P. K. *et al.* Cross-language analysis of phonetic units in language addressed to infants. *Science*  
512 **277**, 684–686 (1997).
- 513 24. Englund, K. T. & Behne, D. M. Infant directed speech in natural interaction: Norwegian vowel  
514 quantity and quality. *Journal of Psycholinguistic Research* **34**, 259–280 (2005).
- 515 25. Fernald, A. The perceptual and affective salience of mothers' speech to infants. in *The origins and*  
516 *growth of communication* (1984).
- 517 26. Falk, S. & Kello, C. T. Hierarchical organization in the temporal structure of infant-direct speech and  
518 song. *Cognition* **163**, 80–86 (2017).
- 519 27. Bryant, G. A. & Barrett, H. C. Recognizing intentions in infant-directed speech: Evidence for uni-  
520 versals. *Psychological Science* **18**, 746–751 (2007).
- 521 28. Piazza, E. A., Jordan, M. C. & Lew-Williams, C. Mothers consistently alter their unique vocal finger-  
522 prints when communicating with infants. *Current Biology* **27**, 3162–3167 (2017).
- 523 29. Trehub, S. E., Unyk, A. M. & Trainor, L. J. Adults identify infant-directed music across cultures.  
524 *Infant Behavior and Development* **16**, 193–211 (1993).
- 525 30. Trehub, S. E., Unyk, A. M. & Trainor, L. J. Maternal singing in cross-cultural perspective. *Infant*  
526 *Behavior and Development* **16**, 285–295 (1993).
- 527 31. Mehr, S. A., Singh, M., York, H., Glowacki, L. & Krasnow, M. M. Form and function in human song.  
528 *Current Biology* **28**, 356–368 (2018).
- 529 32. Mehr, S. A. *et al.* Universality and diversity in human song. *Science* **366**, 957–970 (2019).  
530
- 531 33. Trehub, S. E. Musical predispositions in infancy. *Annals of the New York Academy of Sciences* **930**,  
532 1–16 (2001).
- 533 34. Trehub, S. E. & Trainor, L. Singing to infants: Lullabies and play songs. *Advances in Infancy Research*  
534 **12**, 43–78 (1998).
- 535 35. Trehub, S. E. *et al.* Mothers' and fathers' singing to infants. *Developmental Psychology* **33**, 500–507  
536 (1997).
- 537 36. Thiessen, E. D., Hill, E. A. & Saffran, J. R. Infant-directed speech facilitates word segmentation.  
538 *Infancy* **7**, 53–71 (2005).
- 539 37. Trainor, L. J. & Desjardins, R. N. Pitch characteristics of infant-directed speech affect infants' ability  
540 to discriminate vowels. *Psychonomic Bulletin & Review* **9**, 335–340 (2002).

- 541 38. Werker, J. F. & McLeod, P. J. Infant preference for both male and female infant-directed talk: A developmental study of attentional and affective responsiveness. *Canadian Journal of Psychology/Revue Canadienne de Psychologie* **43**, 230–246 (1989).  
542
- 543 39. Ma, W., Fiveash, A., Margulis, E. H., Behrend, D. & Thompson, W. F. Song and infant-directed speech facilitate word learning. *Quarterly Journal of Experimental Psychology* **73**, 1036–1054 (2020).  
544
- 545 40. Falk, D. Prelinguistic evolution in early hominins: Whence motherese? *Behavioral and Brain Sciences* **27**, 491–502 (2004).  
546
- 547 41. Mehr, S. A. & Krasnow, M. M. Parent-offspring conflict and the evolution of infant-directed song. *Evolution and Human Behavior* **38**, 674–684 (2017).  
548
- 549 42. Mehr, S. A., Kotler, J., Howard, R. M., Haig, D. & Krasnow, M. M. Genomic imprinting is implicated in the psychology of music. *Psychological Science* **28**, 1455–1467 (2017).  
550
- 551 43. Kotler, J., Mehr, S. A., Egner, A., Haig, D. & Krasnow, M. M. Response to vocal music in Angelman syndrome contrasts with Prader-Willi syndrome. *Evolution and Human Behavior* **40**, 420–426 (2019).  
552
- 553 44. Cirelli, L. K., Jurewicz, Z. B. & Trehub, S. E. Effects of maternal singing style on mother–infant arousal and behavior. *Journal of Cognitive Neuroscience* (2019). doi:[10.1162/jocn\\_a\\_01402](https://doi.org/10.1162/jocn_a_01402)  
554
- 555 45. Cirelli, L. K. & Trehub, S. E. Familiar songs reduce infant distress. *Developmental Psychology* (2020). doi:[10.1037/dev0000917](https://doi.org/10.1037/dev0000917)  
556
- 557 46. Mehr, S. A., Krasnow, M. M., Bryant, G. A. & Hagen, E. H. Origins of music in credible signaling. *Behavioral and Brain Sciences* 1–41 (2020). doi:[10.1017/S0140525X20000345](https://doi.org/10.1017/S0140525X20000345)  
558
- 559 47. Grieser, D. L. & Kuhl, P. K. Maternal speech to infants in a tonal language: Support for universal prosodic features in motherese. *Developmental Psychology* **24**, 14 (1988).  
560
- 561 48. Fisher, C. & Tokura, H. Acoustic cues to grammatical structure in infant-directed speech: Cross-linguistic evidence. *Child Development* **67**, 3192–3218 (1996).  
562
- 563 49. Broesch, T. L. & Bryant, G. A. Prosody in Infant-Directed Speech Is Similar Across Western and Traditional Cultures. *Journal of Cognition and Development* **16**, 31–43 (2015).  
564
- 565 50. Farran, L. K., Lee, C.-C., Yoo, H. & Oller, D. K. Cross-Cultural Register Differences in Infant-Directed Speech: An Initial Study. *PLOS ONE* **11**, e0151518 (2016).  
566
- 567 51. Henrich, J., Heine, S. J. & Norenzayan, A. The weirdest people in the world? *Behavioral and Brain Sciences* **33**, 61–83 (2010).  
568
- 569 52. Yarkoni, T. The generalizability crisis. *Behavioral and Brain Sciences* (2019). doi:[10.1017/S0140525X20001685](https://doi.org/10.1017/S0140525X20001685)  
570
- 571 53. Broesch, T. & Bryant, G. A. Fathers’ Infant-Directed Speech in a Small-Scale Society. *Child Development* **89**, e29–e41 (2018).  
572
- 573 54. Ochs, E. & Schieffelin, B. Language acquisition and socialization. *Culture theory: Essays on mind, self, and emotion* 276–320 (1984).  
574
- 575 55. Ratner, N. B. Phonological rule usage in mother-child speech. *Journal of Phonetics* **12**, 245–254 (1984).  
576
- 577 56. Schieffelin, B. B. *The give and take of everyday life: Language, socialization of Kaluli children*. (CUP Archive, 1990).  
578



- 579 57. Ratner, N. B. & Pye, C. Higher pitch in BT is not universal: Acoustic evidence from Quiche Mayan.  
580 *Journal of child language* **11**, 515–522 (1984).
- 581 58. Pye, C. Quiché mayan speech to children. *Journal of child language* **13**, 85–100 (1986).  
582
- 583 59. Heath, S. B. *Ways with words: Language, life and work in communities and classrooms*. (Cambridge  
584 university Press, 1983).
- 585 60. Trehub, S. E. Challenging infant-directed singing as a credible signal of maternal attention. *Behavioral  
586 and Brain Sciences* (2021).
- 587 61. Räsänen, O., Kakouros, S. & Soderstrom, M. Is infant-directed speech interesting because it is surpris-  
588 ing? – Linking properties of IDS to statistical learning and attention at the prosodic level. *Cognition*  
**178**, 193–206 (2018).
- 589 62. Cristia, A. & Seidl, A. The hyperarticulation hypothesis of infant-directed speech. *Journal of child  
590 language* **41**, 913–934 (2014).
- 591 63. Kalashnikova, M., Carignan, C. & Burnham, D. The origins of babytalk: Smiling, teaching or social  
592 convergence? *Royal Society Open Science* **4**, 170306 (2017).
- 593 64. Kitamura, C., Thanavishuth, C., Burnham, D. & Luksaneeyanawin, S. Universality and specificity in  
594 infant-directed speech: Pitch modifications as a function of infant age and sex in a tonal and non-tonal  
language. *Infant Behavior and Development* **24**, 372–392 (2001).
- 595 65. Fernald, A. Intonation and communicative intent in mothers’ speech to infants: Is the melody the  
596 message? *Child Development* **60**, 1497–1510 (1989).
- 597 66. Broesch, T., Rochat, P., Olah, K., Broesch, J. & Henrich, J. Similarities and Differences in Maternal  
598 Responsiveness in Three Societies: Evidence From Fiji, Kenya, and the United States. *Child Devel-  
opment* **87**, 700–711 (2016).
- 599 67. ManyBabies Consortium. Quantifying sources of variability in infancy research using the infant-  
600 directed-speech preference. *Advances in Methods and Practices in Psychological Science* **3**, 24–52  
(2020).
- 601 68. Soley, G. & Sebastian-Galles, N. Infants’ expectations about the recipients of infant-directed and  
602 adult-directed speech. *Cognition* **198**, 104214 (2020).
- 603 69. Byers-Heinlein, K. *et al.* A Multilab Study of Bilingual Infants: Exploring the Preference for Infant-  
604 Directed Speech. *Advances in Methods and Practices in Psychological Science* **30** (2021).
- 605 70. Fernald, A. *et al.* A cross-language study of prosodic modifications in mothers’ and fathers’ speech  
606 to preverbal infants. *Journal of Child Language* **16**, 477–501 (1989).
- 607 71. Kitamura, C. & Burnham, D. Pitch and Communicative Intent in Mother’s Speech: Adjustments for  
608 Age and Sex in the First Year. *Infancy* **4**, 85–110 (2003).
- 609 72. Kitamura, C. & Lam, C. Age-Specific Preferences for Infant-Directed Affective Intent. *Infancy* **14**,  
610 77–100 (2009).
- 611 73. Hilton, C., Crowley, L., Yan, R., Martin, A. & Mehr, S. *Children infer the behavioral contexts of  
612 unfamiliar foreign songs*. (PsyArXiv, 2021). doi:10.31234/osf.io/rz6qn
- 613 74. Yan, R. *et al.* *Across demographics and recent history, most parents sing to their infants and toddlers  
614 daily*. (PsyArXiv, 2021). doi:10.31234/osf.io/fy5bh

- 615 75. Custodero, L. A., Rebello Britto, P. & Brooks-Gunn, J. Musical lives: A collective portrait of Amer-  
616 ican parents and their young children. *Journal of Applied Developmental Psychology* **24**, 553–572  
(2003).
- 617 76. Mendoza, J. K. & Fausey, C. M. Everyday music in infancy. *Developmental Science* (2021).  
618 doi:[10.31234/osf.io/sqatb](https://doi.org/10.31234/osf.io/sqatb)
- 619 77. Konner, M. Aspects of the developmental ethology of a foraging people. in *Ethological Studies of*  
620 *Child Behaviour* (ed. Blurton Jones, N. G.) 285–304 (Cambridge University Press, 1972).
- 621 78. Marlowe, F. *The Hadza hunter-gatherers of Tanzania*. (University of California Press, 2010).  
622
- 623 79. Bainbridge, C. M. *et al.* Infants relax in response to unfamiliar foreign lullabies. *Nature Human*  
624 *Behaviour* (2021). doi:[10.1038/s41562-020-00963-z](https://doi.org/10.1038/s41562-020-00963-z)
- 625 80. Hagen, E. H. & Bryant, G. A. Music and dance as a coalition signaling system. *Human Nature* **14**,  
626 21–51 (2003).
- 627 81. Corbeil, M., Trehub, S. E. & Peretz, I. Singing delays the onset of infant distress. *Infancy* **21**, 373–391  
628 (2016).
- 629 82. Arnal, L. H., Flinker, A., Kleinschmidt, A., Giraud, A.-L. & Poeppel, D. Human screams occupy a  
630 privileged niche in the communication soundscape. *Current Biology* **25**, 2051–2056 (2015).
- 631 83. Friedman, J., Hastie, T. & Tibshirani, R. Lasso and elastic-net regularized generalized linear models.  
632 Rpackage version 2.0-5. (2016).
- 633 84. Fitch, W. T. Vocal tract length and formant frequency dispersion correlate with body size in rhesus  
634 macaques. *The Journal of the Acoustical Society of America* **11** (1997).
- 635 85. Blumstein, D. T., Bryant, G. A. & Kaye, P. The sound of arousal in music is context-dependent.  
636 *Biology Letters* **8**, 744–747 (2012).
- 637 86. Reber, S. A. *et al.* Formants provide honest acoustic cues to body size in American alligators.  
638 *Scientific Reports* **7**, 1816 (2017).
- 639 87. Reby, D. *et al.* Red deer stags use formants as assessment cues during intrasexual agonistic interac-  
640 tions. *Proceedings of the Royal Society B: Biological Sciences* **272**, 941–947 (2005).
- 641 88. Bertoncini, J., Bijeljac-Babic, R., Jusczyk, P. W., Kennedy, L. J. & Mehler, J. An investigation  
642 of young infants’ perceptual representations of speech sounds. *Journal of Experimental Psychology:*  
*General* **117**, 21–33 (1988).
- 643 89. Werker, J. F. & Lalonde, C. E. Cross-language speech perception: Initial capabilities and develop-  
644 mental change. *Developmental Psychology* **24**, 672 (1988).
- 645 90. Polka, L. & Werker, J. F. Developmental changes in perception of nonnative vowel contrasts. *Journal*  
646 *of Experimental Psychology: Human Perception and Performance* **20**, 421–435 (1994).
- 647 91. Trainor, L. J., Clark, E. D., Huntley, A. & Adams, B. A. The acoustic basis of preferences for infant-  
648 directed singing. *Infant Behavior and Development* **20**, 383–396 (1997).
- 649 92. Tsang, C. D., Falk, S. & Hessel, A. Infants prefer infant-directed song over speech. *Child Development*  
650 **88**, 1207–1215 (2017).
- 651 93. McDermott, J. H., Schultz, A. F., Undurraga, E. A. & Godoy, R. A. Indifference to dissonance in  
652 native Amazonians reveals cultural variation in music perception. *Nature* **535**, 547–550 (2016).

- 653 94. Fernald, A. & Simon, T. Expanded intonation contours in mothers' speech to newborns. *Develop-*  
654 *mental Psychology* **20**, 104–113 (1984).
- 655 95. Trehub, S. E., Hill, D. S. & Kamenetsky, S. B. Parents' sung performances for infants. *Canadian*  
656 *Journal of Experimental Psychology* **51**, 385–396 (1997).
- 657 96. Kirby, K. R. *et al.* D-PLACE: A Global Database of Cultural, Linguistic and Environmental Diversity.  
658 *PLOS ONE* **11**, e0158391 (2016).
- 659 97. Leeuw, J. R. de. jsPsych: A JavaScript library for creating behavioral experiments in a Web browser.  
660 *Behavior Research Methods* **47**, 1–12 (2015).
- 661 98. Hartshorne, J. K., Leeuw, J. de, Goodman, N., Jennings, M. & O'Donnell, T. J. A thousand studies  
662 for the price of one: Accelerating psychological science with Pushkin. *Behavior Research Methods* **51**,  
1782–1803 (2019).
- 663 99. Boersma, P. W. Praat: Doing phonetics by computer. (2019).  
664
- 665 100. Lartillot, O., Toiviainen, P. & Eerola, T. A Matlab toolbox for music information retrieval. in *Data*  
666 *analysis, machine learning and applications* (eds. Preisach, C., Burkhardt, H., Schmidt-Thieme, L.  
& Decker, R.) 261–268 (Springer Berlin Heidelberg, 2008).
- 667 101. Patel, A. D. Musical rhythm, linguistic rhythm, and human evolution. *Music Perception* **24**, 99–104  
668 (2006).
- 669 102. Mertens, P. The prosogram: Semi-automatic transcription of prosody based on a tonal perception  
670 model. in (2004).
- 671 103. Buyens, W., Moonen, M., Wouters, J. & Dijk, B. van. A model for music complexity applied to music  
672 preprocessing for cochlear implants. in 971–975 (IEEE, 2017).
- 673 104. Ding, N. *et al.* Temporal modulations in speech and music. *Neuroscience & Biobehavioral Reviews*  
674 **81**, (2017).
- 675 105. Yale, C. & Forsythe, A. B. Winsorized regression. *Technometrics* **18**, 291–300 (1976).  
676
